# Supplementary material for: Label-Free Quantitative Proteomics Reveals Differences in Molecular Mechanism of Atherosclerosis Related and Non-Related to Chronic Kidney Disease
Source: Int J Mol Sci. 2016 May 2;17(5):631. doi: 10.3390/ijms17050631 (PMC4881457; doi:10.3390/ijms17050631)
Supplement: Supplementary file 1 [file ijms-17-00631-s001.xlsx]

## Sheet: Table S1
Table S1. Complete list of differential proteins identified in plasma of HVs, CKD1-2, CKD3-4, CKD5, and CVD patients. Table provides information about the name of proteins, number of identified peptides, ANOVA and t-test p values, fold changes for all group comparisons, SwissProt accession number ,and mean LFQ intensities for all analyzed experimental group. n/a - not applicable
Protein Names	Unique Peptides	Mean CKD5	Mean CVD	Mean CKD1-2	Mean CKD3-4	Mean HV	ANOVA p-Value	T-Test p-Value HV vs. CKD5	Fold Change HV vs. CKD5	Fold Change CKD5 vs. HV	T-Test p-Value_HV vs. CKD3-4	Fold Change HV vs. CKD3-4	Fold Change CKD3-4 vs. HV	T-Test p-Value_HV vs. CKD1-2	Fold Change HV vs. CKD1-2	Fold Change CKD1-2 vs. HV	T-Test p-Value_HV vs. CVD	Fold Change HV vs. CVD	Fold Change CVD vs. HV	T-Test p-Value_CKD1-2 vs. CKD3-4	Fold Change CKD1-2 vs. CKD3-4	Fold Change CKD3-4 vs. CKD1-2	T-Test p-Value_CKD1-2 vs. CKD5	Fold Change CKD1-2 vs. CKD5	Fold Change CKD5 vs. CKD1-2	T-Test p-Value_CKD1-2 vs. CVD	Fold Change CKD1-2 vs. CVD	Fold Change CVD vs. CKD1-2	T-Test p-Value_CKD3-4 vs. CKD5	Fold Change CKD3-4 vs. CKD5	Fold Change CKD5 vs. CKD3-4	T-Test p-Value_CKD3-4 vs. CVD	Fold Change CKD3-4 vs. CVD	Fold Change CVD vs. CKD3-4	T-Test p-Value_CKD5 vs. CVD	Fold Change CKD5 vs. CVD	Fold Change CVD vs. CKD5	Protein IDs	Majority Protein IDs	Gene Names	Fasta headers
Protein AMBP;Alpha-1-microglobulin	27	24432900000	6990290000	10202900000	14285600000	4987260000	5.08643e-54	9.11188e-19	0.204121	4.89906	3.53971e-14	0.349111	2.86442	2.25989e-08	0.488808	2.04579	0.00250799	0.713455	1.40163	7.10982e-07	0.714209	1.40015	2.8143e-14	0.417589	2.3947	0.00205618	1.45958	0.685128	5.30234e-09	0.584687	1.71032	0	2.04363	0.489324	0	3.49526	0.286102	P02760;B7Z8R6;S4R3Y4;S4R471;P78492	P02760;B7Z8R6	AMBP	>sp|P02760|AMBP_HUMAN Protein AMBP OS=Homo sapiens GN=AMBP PE=1 SV=1;>tr|B7Z8R6|B7Z8R6_HUMAN cDNA FLJ51445, highly similar to AMBP protein OS=Homo sapiens PE=2 SV=1
Complement factor D	11	2637290000	158806000	163182000	1040470000	10929500	1.83281e-51	2.09487e-16	0.00414422	241.3	5.48276e-16	0.0105044	95.1983	0.000414857	0.0669774	14.9304	4.32706e-05	0.068823	14.53	5.74409e-11	0.156835	6.37613	1.11975e-13	0.0618749	16.1616	0.922467	1.02756	0.973183	1.05153e-07	0.394522	2.53471	0	6.55183	0.152629	0	16.607	0.0602156	Q6FHW3;K7ERG9;A6XNE2;P00746	Q6FHW3;K7ERG9;A6XNE2;P00746	DF CFD	>tr|Q6FHW3|Q6FHW3_HUMAN DF protein OS=Homo sapiens GN=DF PE=2 SV=1;>tr|K7ERG9|K7ERG9_HUMAN Complement factor D OS=Homo sapiens GN=CFD PE=3 SV=1;>tr|A6XNE2|A6XNE2_HUMAN Complement factor D preproprotein OS=Homo sapiens PE=2 SV=1;>sp|P00746|CFAD_HUMAN Comple
Glyceraldehyde-3-phosphate dehydrogenase	8	0	6625200	3431330	0	137289000	2.53334e-49	0	n/a	0	2.22045e-16	n/a	0	4.21885e-15	40.0104	0.0249935	0	20.7222	0.0482573	0.14778	n/a	0	0.127482	n/a	0	0.580161	0.517921	1.9308	1	n/a	n/a	0.229273	0	n/a	0.205834	0	n/a	V9HVZ4;P04406;Q2TSD0;Q0QET7;E7EUT5;A4UCT1;B4DRV9;Q16768;Q5ZEY3	V9HVZ4;P04406;Q2TSD0;Q0QET7;E7EUT5;A4UCT1;B4DRV9	HEL-S-162eP GAPDH	>tr|V9HVZ4|V9HVZ4_HUMAN Glyceraldehyde-3-phosphate dehydrogenase OS=Homo sapiens GN=HEL-S-162eP PE=2 SV=1;>sp|P04406|G3P_HUMAN Glyceraldehyde-3-phosphate dehydrogenase OS=Homo sapiens GN=GAPDH PE=1 SV=3;>tr|Q2TSD0|Q2TSD0_HUMAN Glyceraldehyde-3-phosphate de
Pigment epithelium-derived factor	25	4480830000	2343440000	2659710000	3405710000	2108930000	9.71129e-45	1.2747e-21	0.470656	2.12469	1.04798e-14	0.619234	1.6149	2.26058e-06	0.792917	1.26117	0.0195202	0.899929	1.1112	1.19344e-05	0.780956	1.28048	1.17226e-13	0.593575	1.68471	0.00732059	1.13496	0.881089	1.10407e-06	0.760062	1.31568	7.08322e-14	1.4533	0.688091	0	1.91207	0.522992	P36955;I3L4N7;I3L107;I3L4F9;I3L4Z0;CON__Q95121;I3L2R7;I3L3Z3;I3L425;I3L1U4	P36955	SERPINF1	>sp|P36955|PEDF_HUMAN Pigment epithelium-derived factor OS=Homo sapiens GN=SERPINF1 PE=1 SV=4
Beta-2-microglobulin;Beta-2-microglobulin form pI 5.3	9	4521360000	215556000	347269000	1142260000	141090000	2.22318e-44	2.48474e-13	0.0312052	32.0459	9.93136e-10	0.123518	8.09597	0.000430855	0.406284	2.46133	0.112962	0.65454	1.52779	3.47767e-06	0.304019	3.28927	2.64098e-11	0.0768063	13.0198	0.0216997	1.61104	0.620718	1.36294e-08	0.252636	3.95826	1.11022e-15	5.29913	0.18871	0	20.9753	0.047675	P61769;H0YL18;B4E0X1;A6XMH4;H0YLF3;F5H6I0;A6XND9;A6XMH5	P61769;H0YL18;B4E0X1;A6XMH4;H0YLF3;F5H6I0;A6XND9;A6XMH5	B2M	>sp|P61769|B2MG_HUMAN Beta-2-microglobulin OS=Homo sapiens GN=B2M PE=1 SV=1;>tr|H0YL18|H0YL18_HUMAN Beta-2-microglobulin form pI 5.3 OS=Homo sapiens GN=B2M PE=1 SV=1;>tr|B4E0X1|B4E0X1_HUMAN Beta-2-microglobulin OS=Homo sapiens PE=2 SV=1;>tr|A6XMH4|A6XMH4_H
Retinol-binding protein 4;Plasma retinol-binding protein(1-182);Plasma retinol-binding protein(1-181);Plasma retinol-binding protein(1-179);Plasma retinol-binding protein(1-176)	15	15969900000	4447770000	6566630000	9459790000	4853370000	7.31421e-38	1.26968e-13	0.303907	3.29048	5.92567e-08	0.513053	1.94912	0.0241944	0.739096	1.353	0.325173	1.09119	0.916429	0.00169069	0.694162	1.44059	1.40136e-09	0.411188	2.43198	4.06277e-05	1.47639	0.677329	4.42733e-06	0.592351	1.68819	0	2.12686	0.470176	0	3.59054	0.27851	Q5VY30;P02753	Q5VY30;P02753	RBP4	>tr|Q5VY30|Q5VY30_HUMAN Retinol binding protein 4, plasma, isoform CRA_b OS=Homo sapiens GN=RBP4 PE=1 SV=2;>sp|P02753|RET4_HUMAN Retinol-binding protein 4 OS=Homo sapiens GN=RBP4 PE=1 SV=3
Lysozyme C	7	372561000	5904270	0	152648000	0	4.30151e-37	1.52927e-14	0	n/a	2.5414e-05	0	n/a	1	n/a	n/a	0.375116	0	n/a	8.07513e-05	0	n/a	4.03253e-13	0	n/a	0.407959	0	n/a	6.87084e-05	0.409726	2.44065	2.32557e-09	25.8538	0.038679	0	63.1003	0.0158478	B2R4C5;P61626;F8VV32	B2R4C5;P61626;F8VV32	LYZ	>tr|B2R4C5|B2R4C5_HUMAN C-type lysozyme OS=Homo sapiens GN=LYZ PE=2 SV=1;>sp|P61626|LYSC_HUMAN Lysozyme C OS=Homo sapiens GN=LYZ PE=1 SV=1;>tr|F8VV32|F8VV32_HUMAN Lysozyme C OS=Homo sapiens GN=LYZ PE=1 SV=1
Insulin-like growth factor-binding protein 6	5	204936000	0	0	8807610	0	2.69895e-32	3.49618e-09	0	n/a	0.153449	0	n/a	1	n/a	n/a	1	n/a	n/a	0.183248	0	n/a	2.83663e-08	0	n/a	1	n/a	n/a	7.63241e-08	0.0429774	23.2681	0.0255156	n/a	0	0	n/a	0	F8VYK9;P24592;Q9H2B5;F8VVA5	F8VYK9;P24592	IGFBP6	>tr|F8VYK9|F8VYK9_HUMAN Insulin-like growth factor-binding protein 6 OS=Homo sapiens GN=IGFBP6 PE=4 SV=1;>sp|P24592|IBP6_HUMAN Insulin-like growth factor-binding protein 6 OS=Homo sapiens GN=IGFBP6 PE=1 SV=1
Apolipoprotein A-IV	69	66829000000	14317100000	33655700000	46752900000	26652900000	7.35071e-32	1.03781e-09	0.398822	2.50738	1.2741e-05	0.57008	1.75414	0.0469324	0.791928	1.26274	4.43823e-12	1.86161	0.537169	0.0197426	0.719863	1.38915	5.96863e-06	0.503609	1.98567	9.11715e-12	2.35073	0.425399	0.0056147	0.69959	1.42941	0	3.26553	0.306229	0	4.66777	0.214235	P06727;Q13784;CON__Q32PJ2	P06727;Q13784	APOA4	>sp|P06727|APOA4_HUMAN Apolipoprotein A-IV OS=Homo sapiens GN=APOA4 PE=1 SV=3;>tr|Q13784|Q13784_HUMAN APOA4 protein (Fragment) OS=Homo sapiens GN=APOA4 PE=2 SV=1
Cystatin-C	5	111810280	15157600	17691500	75188875	0	8.36507e-27	2.4611e-13	0	n/a	1.3422e-05	0	n/a	0.0172266	0	n/a	0.19711	0	n/a	0.000186196	0.235294	4.25	7.16828e-11	0.158228	6.32	0.865693	1.16717	0.856773	0.0435186	0.672468	1.48706	1.97148e-09	4.96047	0.201594	0	7.37652	0.135565	P01034	P01034	CST3	>sp|P01034|CYTC_HUMAN Cystatin-C OS=Homo sapiens GN=CST3 PE=1 SV=1
Zinc-alpha-2-glycoprotein	29	18249200000	11205400000	8805350000	14896400000	8004160000	2.63788e-22	5.38446e-14	0.438603	2.27996	6.17169e-11	0.537322	1.86108	0.253528	0.909011	1.1001	1.56896e-05	0.714313	1.39995	6.87138e-07	0.591106	1.69174	4.00314e-10	0.482506	2.07251	0.00476211	0.785813	1.27257	0.014646	0.816277	1.22507	6.04828e-05	1.32939	0.752222	2.13942e-11	1.62861	0.614021	P25311;C9JEV0;A0JLQ0;H7BZJ8	P25311;C9JEV0	AZGP1	>sp|P25311|ZA2G_HUMAN Zinc-alpha-2-glycoprotein OS=Homo sapiens GN=AZGP1 PE=1 SV=2;>tr|C9JEV0|C9JEV0_HUMAN Zinc-alpha-2-glycoprotein OS=Homo sapiens GN=AZGP1 PE=3 SV=1
C-X-C motif chemokine;Platelet basic protein;Connective tissue-activating peptide III;TC-2;Connective tissue-activating peptide III(1-81);Beta-thromboglobulin;Neutrophil-activating peptide 2(74);Neutrophil-activating peptide 2(73);Neutrophil-activating peptide 2;TC-1;Neutrophil-activating peptide 2(1-66);Neutrophil-activating peptide 2(1-63)	6	93523900	53354500	213066000	110338000	422195000	7.80558e-22	8.55066e-10	4.5143	0.221518	4.38451e-08	3.82638	0.261344	0.000104286	1.98152	0.504663	0	7.91302	0.126374	0.0243602	1.93103	0.517858	0.00404217	2.2782	0.438943	3.65706e-07	3.9934	0.250413	0.671538	1.17978	0.847613	0.0518003	2.06802	0.483555	0.129915	1.75288	0.570491	D3JV41;P02775;D3JV43;D3JV42	D3JV41;P02775;D3JV43;D3JV42	PPBP	>tr|D3JV41|D3JV41_HUMAN C-X-C motif chemokine (Fragment) OS=Homo sapiens PE=3 SV=1;>sp|P02775|CXCL7_HUMAN Platelet basic protein OS=Homo sapiens GN=PPBP PE=1 SV=3;>tr|D3JV43|D3JV43_HUMAN C-X-C motif chemokine (Fragment) OS=Homo sapiens PE=3 SV=1;>tr|D3JV42
Prostaglandin-H2 D-isomerase	3	481367000	0	0	26038600	0	7.37029e-20	5.39084e-06	0	n/a	0.149158	0	n/a	1	n/a	n/a	1	n/a	n/a	0.178666	0	n/a	2.02439e-05	0	n/a	1	n/a	n/a	4.49972e-05	0.054093	18.4867	0.0240142	n/a	0	4.48397e-12	n/a	0	A0A024R8G3;P41222;H0Y5A1;Q5SQ11	A0A024R8G3;P41222;H0Y5A1	PTGDS	>tr|A0A024R8G3|A0A024R8G3_HUMAN Prostaglandin D2 synthase 21kDa (Brain), isoform CRA_a OS=Homo sapiens GN=PTGDS PE=3 SV=1;>sp|P41222|PTGDS_HUMAN Prostaglandin-H2 D-isomerase OS=Homo sapiens GN=PTGDS PE=1 SV=1;>tr|H0Y5A1|H0Y5A1_HUMAN Prostaglandin-H2 D-isom
Platelet factor 4;Platelet factor 4, short form	6	40215800	13699300	153970000	46059300	261467000	7.05629e-19	6.40306e-08	6.5016	0.153808	4.78873e-07	5.67675	0.176157	0.0263383	1.69817	0.58887	0	19.0862	0.052394	0.00686715	3.34286	0.299145	0.0027118	3.82859	0.261192	3.22416e-08	11.2393	0.0889738	0.806789	1.1453	0.873131	0.0401157	3.36216	0.297427	0.0729208	2.93561	0.340645	P02776;P10720	P02776	PF4	>sp|P02776|PLF4_HUMAN Platelet factor 4 OS=Homo sapiens GN=PF4 PE=1 SV=2
Coagulation factor XIII B chain	33	1243880000	779873000	904326000	918165000	748463000	2.41305e-18	9.14406e-12	0.601716	1.66191	0.0011212	0.815173	1.22673	0.00050299	0.827647	1.20824	0.479747	0.959724	1.04197	0.795006	0.984928	1.0153	1.46739e-06	0.72702	1.37548	0.0100818	1.15958	0.86238	1.08287e-05	0.738146	1.35475	0.00640973	1.17733	0.849382	2.24265e-14	1.59498	0.626968	P05160;CON__Q2TBQ1	P05160	F13B	>sp|P05160|F13B_HUMAN Coagulation factor XIII B chain OS=Homo sapiens GN=F13B PE=1 SV=3
Uteroglobin	3	72416100	0	0	0	0	1.60854e-17	2.975e-05	0	n/a	1	n/a	n/a	1	n/a	n/a	1	n/a	n/a	1	n/a	n/a	9.26417e-05	0	n/a	1	n/a	n/a	6.96487e-05	0	n/a	1	n/a	n/a	1.77727e-10	n/a	0	P11684;E9PN95	P11684;E9PN95	SCGB1A1	>sp|P11684|UTER_HUMAN Uteroglobin OS=Homo sapiens GN=SCGB1A1 PE=1 SV=1;>tr|E9PN95|E9PN95_HUMAN Uteroglobin OS=Homo sapiens GN=SCGB1A1 PE=4 SV=1
Vitronectin;Vitronectin V65 subunit;Vitronectin V10 subunit;Somatomedin-B	27	8830520000	13369500000	12297500000	10406300000	13437100000	1.69171e-17	2.19143e-10	1.52167	0.657175	0.000151385	1.29125	0.774445	0.817903	1.09267	0.91519	0.0622211	1.00506	0.994969	0.00338455	1.18174	0.846213	1.90011e-07	1.39261	0.718074	0.0589171	0.919817	1.08717	0.00164831	1.17845	0.848574	8.18517e-08	0.778361	1.28475	2.0252e-15	0.660497	1.51401	D9ZGG2;P04004;J7HH10;B7Z553;H0YJW9;F5GX75	D9ZGG2;P04004;J7HH10	VTN	>tr|D9ZGG2|D9ZGG2_HUMAN Vitronectin OS=Homo sapiens GN=VTN PE=4 SV=1;>sp|P04004|VTNC_HUMAN Vitronectin OS=Homo sapiens GN=VTN PE=1 SV=1;>tr|J7HH10|J7HH10_HUMAN Vitronectin (Fragment) OS=Homo sapiens PE=4 SV=1
Tropomyosin alpha-4 chain	7	0	953960	0	0	35719900	2.54927e-17	1.28396e-05	n/a	0	3.22141e-05	n/a	0	4.38564e-05	n/a	0	3.75687e-10	37.4438	0.0267067	1	n/a	n/a	1	n/a	n/a	0.551133	0	n/a	1	n/a	n/a	0.54381	0	n/a	0.522865	0	n/a	V9HW56;P67936;B4DVY2;B4DTB1;K7EMU5;K7ENT6;K7EPV9;K7EPB9;K7EP68;A0A087WWU8;Q5VU59;Q5HYB6;B2RDE1;J3KN67;P06753;H0YL80;D6R904;H0YKX5;H0YKP3;B4DTK3;Q5VU62;B4DQ80;Q8NAG3;B4DGC2;Q8TCG4;B4DWT5;C9IZA2;H0YNC7;Q5VU61;Q15657;Q8NAH0;Q1ZYL5;F5H7S3;D9YZV7;H7BYY1;H0YK48;B7Z722;H0YL52;B7Z596;V9HW25;Q5TCU3;D9YZV5;D9YZV4;CON__Q3SX28;A7XZE4;A0A024R5W6;Q59GR8;Q5TCU8;Q6ZN40;P09493;P07951	V9HW56;P67936;B4DVY2;B4DTB1	HEL-S-108 TPM4	>tr|V9HW56|V9HW56_HUMAN Epididymis secretory protein Li 108 OS=Homo sapiens GN=HEL-S-108 PE=2 SV=1;>sp|P67936|TPM4_HUMAN Tropomyosin alpha-4 chain OS=Homo sapiens GN=TPM4 PE=1 SV=3;>tr|B4DVY2|B4DVY2_HUMAN cDNA FLJ54184, highly similar to Tropomyosin alpha-
Pregnancy zone protein	38	503041000	310039000	565526000	760517000	2254650000	6.39408e-17	7.86915e-08	4.48204	0.223113	5.44248e-05	2.96463	0.33731	6.45863e-07	3.98682	0.250827	2.22045e-16	7.27215	0.137511	0.472478	0.743607	1.3448	0.750354	1.12421	0.88951	0.0913007	1.82405	0.548231	0.323126	1.51184	0.661446	0.0160493	2.45297	0.407669	0.184631	1.62251	0.616329	B2R950;P20742;F5GXY0	B2R950;P20742	PZP	>tr|B2R950|B2R950_HUMAN cDNA, FLJ94213, highly similar to Homo sapiens pregnancy-zone protein (PZP), mRNA OS=Homo sapiens PE=2 SV=1;>sp|P20742|PZP_HUMAN Pregnancy zone protein OS=Homo sapiens GN=PZP PE=1 SV=4
Angiogenin	6	108543000	16441600	27419700	42894900	3201870	5.05755e-16	5.98857e-08	0.0294986	33.8999	4.758e-05	0.0746445	13.3968	0.000536737	0.116773	8.56365	0.0337711	0.194742	5.135	0.177893	0.63923	1.56438	8.29366e-05	0.252616	3.95858	0.146662	1.6677	0.599627	0.00157952	0.395188	2.53044	0.00212142	2.60892	0.3833	2.53202e-11	6.60173	0.151475	W0UV28;P03950	W0UV28;P03950	RAA1 ANG	>tr|W0UV28|W0UV28_HUMAN Ribonuclease A A1 OS=Homo sapiens GN=RAA1 PE=3 SV=1;>sp|P03950|ANGI_HUMAN Angiogenin OS=Homo sapiens GN=ANG PE=1 SV=1
Peptidase inhibitor 16	3	247047000	71279300	75844600	200083000	69031800	4.64932e-15	4.15925e-06	0.279428	3.57874	7.28071e-06	0.345016	2.89842	0.656473	0.910174	1.09869	0.87491	0.968469	1.03256	4.65154e-05	0.379066	2.63807	2.63243e-05	0.307005	3.25728	0.760527	1.06405	0.939807	0.276528	0.809899	1.23472	6.12284e-09	2.80703	0.356249	1.71346e-10	3.4659	0.288525	Q6UXB8	Q6UXB8	PI16	>sp|Q6UXB8|PI16_HUMAN Peptidase inhibitor 16 OS=Homo sapiens GN=PI16 PE=1 SV=1
Glutathione peroxidase 3	7	70283500	343824000	347868000	142619000	426460000	2.96587e-14	4.44089e-16	6.06771	0.164807	1.69471e-09	2.9902	0.334425	0.517813	1.22592	0.815711	0.0881556	1.24034	0.806228	1.43153e-06	2.0292	0.492806	2.18856e-11	4.9495	0.202041	0.309176	1.01176	0.988375	0.0411607	2.0292	0.492806	0.000137905	0.414802	2.41079	5.14285e-08	0.204417	4.89196	A0A087X1J7;P22352;H0YBE4;E5RG32;H0YC19	A0A087X1J7;P22352	GPX3	>tr|A0A087X1J7|A0A087X1J7_HUMAN Glutathione peroxidase 3 OS=Homo sapiens GN=GPX3 PE=4 SV=1;>sp|P22352|GPX3_HUMAN Glutathione peroxidase 3 OS=Homo sapiens GN=GPX3 PE=1 SV=2
Hemoglobin subunit beta;LVV-hemorphin-7;Spinorphin	3	27928300000	23101500000	53412000000	14674400000	28885900000	3.01152e-14	0.787955	1.03429	0.966849	5.64913e-07	1.96846	0.508013	5.59904e-06	0.540813	1.84907	0.0660644	1.25039	0.79975	3.39504e-09	3.63981	0.27474	6.54158e-05	1.91247	0.522884	5.48347e-10	2.31206	0.432515	0.00212254	0.525431	1.9032	0.016619	0.635214	1.57427	0.193302	1.20894	0.827172	D9YZU5;P68871;C8C504;Q14473;Q0Z944;Q9BWV6;B3VL86;Q4TWB7;Q8IUL9;B3VL31;Q6V0K9;Q52MT0;E9NGZ5;B3VL05;Q9UK54;Q3Y9I8;B3VL17;Q8IZI0;Q3LR79;Q4JLR8;B2M1S6;B5ANL9;F8W6P5;A1YZ08;Q9UP81;Q4TZM4;Q9BWU5;Q14484;D5FZW3;E9M263;Q9BXA2;A9YUX2;Q9H1I6;J7LKS8;B3VL12;O95408;Q6VFQ5;Q9UBV6;B2M0Y1;Q86VF0;K4EN30;Q7Z2K5;Q9HAR8;Q7Z7B3;Q3L3Q5;Q6J1Z8;B2M1S7;Q6VFQ6;CON__Q3SX09;B3VL28;Q9UM85;Q9Y6D8;Q9UE59;Q2XP30;D1MGP8;O95412;Q5…	D9YZU5;P68871;C8C504;Q14473;Q0Z944;Q9BWV6;B3VL86;Q4TWB7;Q8IUL9;B3VL31;Q6V0K9;Q52MT0;E9NGZ5;B3VL05;Q9UK54;Q3Y9I8;B3VL17;Q8IZI0;Q3LR79;Q4JLR8;B2M1S6;B5ANL9;F8W6P5	HBB	>tr|D9YZU5|D9YZU5_HUMAN Hemoglobin, beta OS=Homo sapiens GN=HBB PE=3 SV=1;>sp|P68871|HBB_HUMAN Hemoglobin subunit beta OS=Homo sapiens GN=HBB PE=1 SV=2;>tr|C8C504|C8C504_HUMAN Beta-globin OS=Homo sapiens GN=HBB PE=3 SV=1;>tr|Q14473|Q14473_HUMAN Beta-globin
Fibrinogen alpha chain;Fibrinopeptide A;Fibrinogen alpha chain	85	192464000000	140367000000	166200000000	183885000000	104023000000	1.52302e-13	3.25393e-12	0.54048	1.85021	1.3221e-09	0.565696	1.76773	0.000173915	0.62589	1.59772	0.0357269	0.741079	1.34938	0.0140752	0.903826	1.10641	0.000919014	0.863538	1.15803	0.0842654	1.18404	0.844567	0.417532	0.955425	1.04665	5.57547e-06	1.31003	0.763341	2.4034e-08	1.37115	0.729316	P02671;Q3KRA7;Q6NSD8;A0A087WUA0;Q8WW76;Q86Z09;CON__P02672	P02671	FGA	>sp|P02671|FIBA_HUMAN Fibrinogen alpha chain OS=Homo sapiens GN=FGA PE=1 SV=2
Lumican	16	2486340000	1671710000	1680250000	2166220000	1566750000	2.66558e-13	4.73176e-08	0.630143	1.58694	2.21407e-06	0.723264	1.38262	0.0889086	0.932451	1.07244	0.258137	0.937214	1.06699	0.000451898	0.77566	1.28922	7.59968e-06	0.675793	1.47974	0.933794	1.00511	0.994917	0.090457	0.871249	1.14778	5.32098e-05	1.29581	0.771718	5.74843e-09	1.4873	0.672358	P51884;Q53FV4;CON__Q05443	P51884;Q53FV4	LUM	>sp|P51884|LUM_HUMAN Lumican OS=Homo sapiens GN=LUM PE=1 SV=2;>tr|Q53FV4|Q53FV4_HUMAN Lumican variant (Fragment) OS=Homo sapiens PE=2 SV=1
Phosphatidylethanolamine-binding protein 4	6	115504000	0	0	0	0	3.49195e-13	0.000316508	0	n/a	1	n/a	n/a	1	n/a	n/a	1	n/a	n/a	1	n/a	n/a	0.000757162	0	n/a	1	n/a	n/a	0.000608216	0	n/a	1	n/a	n/a	3.09033e-08	n/a	0	V9HW76;Q96S96	V9HW76;Q96S96	HEL-S-300 PEBP4	>tr|V9HW76|V9HW76_HUMAN Epididymis secretory protein Li 300 OS=Homo sapiens GN=HEL-S-300 PE=2 SV=1;>sp|Q96S96|PEBP4_HUMAN Phosphatidylethanolamine-binding protein 4 OS=Homo sapiens GN=PEBP4 PE=1 SV=3
Complement factor H-related protein 1	2	1555650000	888785000	1127320000	1083400000	755568000	5.53946e-13	2.55217e-11	0.485693	2.05891	0.00245072	0.697404	1.43389	7.83596e-07	0.670234	1.49202	0.088683	0.850113	1.17631	0.7125	1.04054	0.96104	0.000344697	0.724662	1.37995	0.00715388	1.26838	0.788405	0.00100581	0.696429	1.4359	0.0529286	1.21897	0.820366	1.84073e-10	1.75031	0.571327	Q03591;B1AKG0;Q6LBM9	Q03591;B1AKG0	CFHR1	>sp|Q03591|FHR1_HUMAN Complement factor H-related protein 1 OS=Homo sapiens GN=CFHR1 PE=1 SV=2;>tr|B1AKG0|B1AKG0_HUMAN Complement factor H-related protein 1 OS=Homo sapiens GN=CFHR1 PE=4 SV=1
Guanylin;HMW-guanylin;Guanylin	3	35813700	0	0	0	0	8.18343e-13	0.000386804	0	n/a	1	n/a	n/a	1	n/a	n/a	1	n/a	n/a	1	n/a	n/a	0.00090467	0	n/a	1	n/a	n/a	0.000730837	0	n/a	1	n/a	n/a	4.80213e-08	n/a	0	Q02747	Q02747	GUCA2A	>sp|Q02747|GUC2A_HUMAN Guanylin OS=Homo sapiens GN=GUCA2A PE=1 SV=2
EGF-containing fibulin-like extracellular matrix protein 1	16	195485000	70356000	135856000	197717000	79772900	8.81931e-13	4.70208e-06	0.408077	2.45052	1.79079e-05	0.40347	2.4785	0.00572491	0.587187	1.70303	0.546794	1.13385	0.881954	0.0323086	0.687124	1.45534	0.02438	0.694969	1.43891	0.000274067	1.93098	0.517872	0.941177	1.01142	0.988711	5.5957e-09	2.81024	0.355842	8.38267e-10	2.77851	0.359905	Q12805;B2R6M6;A8KAJ3;Q59G97;B4DWH0;Q53TA7;B3KS53;Q580Q6;C9JQX7;C9J4J8;C9JPZ9;C9JUM4	Q12805;B2R6M6;A8KAJ3;Q59G97;B4DWH0;Q53TA7;B3KS53	EFEMP1	>sp|Q12805|FBLN3_HUMAN EGF-containing fibulin-like extracellular matrix protein 1 OS=Homo sapiens GN=EFEMP1 PE=1 SV=2;>tr|B2R6M6|B2R6M6_HUMAN cDNA, FLJ93024, highly similar to Homo sapiens EGF-containing fibulin-like extracellular matrix protein 1 (EFEMP1)
Fibrinogen beta chain;Fibrinopeptide B;Fibrinogen beta chain	70	266889000000	189141000000	207174000000	241558000000	130042000000	1.16744e-12	9.39082e-12	0.487251	2.05233	3.00075e-09	0.538347	1.85754	0.000119793	0.627695	1.59313	0.04469	0.68754	1.45446	0.00951537	0.857657	1.16597	0.00119011	0.776255	1.28824	0.0993663	1.09534	0.912957	0.671576	0.905088	1.10487	8.00668e-06	1.27713	0.783004	2.05257e-07	1.41106	0.708688	V9HVY1;P02675;B4E1D3;D3DP13;D6REL8;CON__P02676	V9HVY1;P02675;B4E1D3;D3DP13;D6REL8	HEL-S-78p FGB	>tr|V9HVY1|V9HVY1_HUMAN Epididymis secretory sperm binding protein Li 78p OS=Homo sapiens GN=HEL-S-78p PE=2 SV=1;>sp|P02675|FIBB_HUMAN Fibrinogen beta chain OS=Homo sapiens GN=FGB PE=1 SV=2;>tr|B4E1D3|B4E1D3_HUMAN cDNA FLJ53952, highly similar to Fibrinoge
Complement factor H-related protein 2	5	317819000	167868000	147771000	182209000	40888300	1.08764e-11	5.08383e-13	0.128653	7.77286	3.36142e-05	0.224403	4.45626	8.87766e-06	0.2767	3.61402	2.30543e-05	0.243574	4.10553	0.320642	0.810997	1.23305	3.51353e-06	0.464953	2.15075	0.517961	0.880281	1.136	0.00117702	0.573311	1.74426	0.671751	1.08543	0.921294	9.58481e-06	1.89327	0.528187	P36980;V9GYE7	P36980;V9GYE7	CFHR2	>sp|P36980|FHR2_HUMAN Complement factor H-related protein 2 OS=Homo sapiens GN=CFHR2 PE=1 SV=1;>tr|V9GYE7|V9GYE7_HUMAN Complement factor H-related protein 2 OS=Homo sapiens GN=CFHR2 PE=4 SV=1
Carbonic anhydrase 1	11	191328000	100830000	400523000	74932400	155929000	1.44049e-11	0.435021	0.814983	1.22702	0.0140553	2.08093	0.480555	9.16796e-07	0.389313	2.56862	0.0928252	1.54645	0.64664	3.28429e-08	5.34512	0.187086	0.000905502	2.09338	0.477695	9.24181e-11	3.97226	0.251746	0.0250927	0.391644	2.55334	0.473391	0.743156	1.34561	0.0266779	1.89753	0.527001	V9HWE3;P00915;E5RHP7;E5RH81;E5RFE7;E5RIF9;E5RG43;H0YBE2;E5RFL2;E5RGU8;E5RG81;E5RII2;E5RJI8;E5RJF6	V9HWE3;P00915;E5RHP7;E5RH81;E5RFE7;E5RIF9;E5RG43;H0YBE2	HEL-S-11 CA1	>tr|V9HWE3|V9HWE3_HUMAN Carbonic anhydrase I, isoform CRA_a OS=Homo sapiens GN=HEL-S-11 PE=2 SV=1;>sp|P00915|CAH1_HUMAN Carbonic anhydrase 1 OS=Homo sapiens GN=CA1 PE=1 SV=2;>tr|E5RHP7|E5RHP7_HUMAN Carbonic anhydrase 1 (Fragment) OS=Homo sapiens GN=CA1 PE=
Fibrinogen gamma chain	2	199405000000	124688000000	169149000000	171395000000	104733000000	3.94403e-11	4.72856e-08	0.525228	1.90394	7.97704e-05	0.611062	1.63649	7.85704e-07	0.619176	1.61505	0.995908	0.839961	1.19053	0.857717	0.986896	1.01328	0.317014	0.848269	1.17887	1.47657e-05	1.35658	0.737149	0.527009	0.859532	1.16342	3.3885e-05	1.37459	0.727489	1.02898e-07	1.59923	0.6253	P02679;C9JC84	P02679;C9JC84	FGG	>sp|P02679|FIBG_HUMAN Fibrinogen gamma chain OS=Homo sapiens GN=FGG PE=1 SV=3;>tr|C9JC84|C9JC84_HUMAN Fibrinogen gamma chain OS=Homo sapiens GN=FGG PE=1 SV=1
CD59 glycoprotein	2	66370400	0	0	0	0	5.90191e-11	0.00105855	0	n/a	1	n/a	n/a	1	n/a	n/a	1	n/a	n/a	1	n/a	n/a	0.00220965	0	n/a	1	n/a	n/a	0.00183674	0	n/a	1	n/a	n/a	4.41748e-07	n/a	0	E9PNW4;Q6FHM9;E9PR17;P13987;H0YET2	E9PNW4;Q6FHM9;E9PR17;P13987;H0YET2	CD59	>tr|E9PNW4|E9PNW4_HUMAN CD59 glycoprotein OS=Homo sapiens GN=CD59 PE=1 SV=1;>tr|Q6FHM9|Q6FHM9_HUMAN CD59 antigen, complement regulatory protein, isoform CRA_b OS=Homo sapiens GN=CD59 PE=2 SV=1;>tr|E9PR17|E9PR17_HUMAN CD59 glycoprotein OS=Homo sapiens GN=CD
Transferrin variant	2	292789000000	490021000000	457421000000	324512000000	519520000000	8.57339e-11	6.58111e-10	1.77438	0.563576	7.96947e-06	1.60093	0.624638	0.000246485	1.13576	0.880469	0.0655942	1.0602	0.943219	0.121271	1.40957	0.709438	0.00103347	1.56229	0.640086	0.0588476	0.933472	1.07127	0.147931	1.10835	0.902244	0.000524228	0.662241	1.51002	8.92105e-08	0.597503	1.67363	Q53H26	Q53H26		>tr|Q53H26|Q53H26_HUMAN Transferrin variant (Fragment) OS=Homo sapiens PE=2 SV=1
Osteopontin	4	82694500	0	0	0	0	3.97724e-10	0.00165876	0	n/a	1	n/a	n/a	1	n/a	n/a	1	n/a	n/a	1	n/a	n/a	0.0032907	0	n/a	1	n/a	n/a	0.00277051	0	n/a	1	n/a	n/a	1.19274e-06	n/a	0	Q3LGB0;A0A024RDJ0;F2YQ21;A0A024RDE6;A0A024RDE2;B7Z351;P10451;C4B6Q2;A6XMV6;D6R9C5	Q3LGB0;A0A024RDJ0;F2YQ21;A0A024RDE6;A0A024RDE2;B7Z351;P10451;C4B6Q2;A6XMV6	opn SPP1	>tr|Q3LGB0|Q3LGB0_HUMAN Osteopontin (Fragment) OS=Homo sapiens GN=opn PE=2 SV=1;>tr|A0A024RDJ0|A0A024RDJ0_HUMAN Secreted phosphoprotein 1 (Osteopontin, bone sialoprotein I, early T-lymphocyte activation 1), isoform CRA_a OS=Homo sapiens GN=SPP1 PE=4 SV=1;>
Thrombospondin 1	2	6071650	0	25070900	11732900	31112200	1.94028e-09	0.000363933	5.12418	0.195153	0.00138266	2.65171	0.377116	0.50656	1.24097	0.805822	2.9976e-14	n/a	0	0.140691	2.1368	0.467989	0.0189598	4.12917	0.242179	9.17747e-08	n/a	0	0.368904	1.93241	0.517489	0.000316137	n/a	0	0.0105311	n/a	0	A0A024R9Q1;A0PJG0;Q6MZL6;P35442	A0A024R9Q1	THBS1	>tr|A0A024R9Q1|A0A024R9Q1_HUMAN Thrombospondin 1, isoform CRA_a OS=Homo sapiens GN=THBS1 PE=4 SV=1
Leucine-rich alpha-2-glycoprotein	2	5080250000	3911720000	2640590000	4540640000	2489370000	3.40251e-09	1.45541e-06	0.490009	2.04078	1.13681e-07	0.548242	1.82401	0.541108	0.942732	1.06075	1.83575e-05	0.636388	1.57137	4.54341e-05	0.581546	1.71956	6.02713e-05	0.519776	1.92391	0.000761762	0.675046	1.48138	0.372749	0.893783	1.11884	0.109871	1.16078	0.861491	0.00867908	1.29873	0.769986	Q68CK4;B4E1I8	Q68CK4;B4E1I8	HMFT1766	>tr|Q68CK4|Q68CK4_HUMAN Leucine-rich alpha-2-glycoprotein OS=Homo sapiens GN=HMFT1766 PE=2 SV=1;>tr|B4E1I8|B4E1I8_HUMAN cDNA FLJ54228, highly similar to Leucine-rich alpha-2-glycoprotein OS=Homo sapiens PE=2 SV=1
Coagulation factor XIII A chain	21	322389000	147653000	265276000	191064000	285206000	5.26362e-09	0.401575	0.884664	1.13037	0.00233526	1.49272	0.669916	0.359393	1.07513	0.930121	5.08182e-08	1.9316	0.517706	0.0166625	1.38841	0.720246	0.221699	0.822844	1.2153	4.79206e-06	1.79662	0.556601	0.0108015	0.59265	1.68734	0.114373	1.29401	0.772793	1.11133e-06	2.18342	0.457996	P00488;B2R6V9;B4E2L8;Q9NQP5;A6PVK5;H0Y796;Q9NZ69;A0A2H0;H0Y4W5;H3BPV8;H3BTE6;F5H563;B7Z4Q8;B7Z4C3;P16452	P00488;B2R6V9;B4E2L8	F13A1	>sp|P00488|F13A_HUMAN Coagulation factor XIII A chain OS=Homo sapiens GN=F13A1 PE=1 SV=4;>tr|B2R6V9|B2R6V9_HUMAN cDNA, FLJ93141, highly similar to Homo sapiens coagulation factor XIII, A1 polypeptide (F13A1), mRNA OS=Homo sapiens PE=2 SV=1;>tr|B4E2L8|B4E2L
Insulin-like growth factor-binding protein 4	6	59084200	0	0	20273900	0	6.79673e-09	0.00134954	0	n/a	0.0144843	0	n/a	1	n/a	n/a	1	n/a	n/a	0.0224891	0	n/a	0.00274062	0	n/a	1	n/a	n/a	0.0593983	0.343136	2.9143	0.00014371	n/a	0	7.55653e-07	n/a	0	A0A024R1U8;P22692	A0A024R1U8;P22692	IGFBP4	>tr|A0A024R1U8|A0A024R1U8_HUMAN Insulin-like growth factor binding protein 4, isoform CRA_a OS=Homo sapiens GN=IGFBP4 PE=4 SV=1;>sp|P22692|IBP4_HUMAN Insulin-like growth factor-binding protein 4 OS=Homo sapiens GN=IGFBP4 PE=1 SV=2
Inter-alpha-trypsin inhibitor heavy chain H3	37	2581700000	2219040000	1710940000	2494760000	1581110000	7.03879e-09	1.9818e-08	0.61243	1.63284	5.3037e-08	0.633772	1.57785	0.223987	0.924118	1.08211	3.70039e-05	0.71252	1.40347	6.04066e-05	0.685813	1.45812	1.84603e-05	0.662718	1.50894	0.00307025	0.771027	1.29697	0.67959	0.966325	1.03485	0.122376	1.12425	0.88948	0.0393397	1.16343	0.859527	Q06033;A0A087WW43;E7ET33;B4DPQ4;CON__Q0V8M9	Q06033;A0A087WW43;E7ET33;B4DPQ4	ITIH3	>sp|Q06033|ITIH3_HUMAN Inter-alpha-trypsin inhibitor heavy chain H3 OS=Homo sapiens GN=ITIH3 PE=1 SV=2;>tr|A0A087WW43|A0A087WW43_HUMAN Inter-alpha-trypsin inhibitor heavy chain H3 OS=Homo sapiens GN=ITIH3 PE=4 SV=1;>tr|E7ET33|E7ET33_HUMAN Inter-alpha-tryps
Fibronectin 1	2	22307300000	12561200000	24429000000	10833300000	12061000000	1.1056e-08	2.45532e-07	0.540675	1.84954	0.483874	1.11333	0.898209	9.86552e-06	0.493716	2.02545	0.816623	0.960179	1.04147	6.77467e-05	2.25499	0.443461	0.490105	1.09511	0.913148	4.18419e-05	1.9448	0.514192	1.31192e-05	0.485639	2.05914	0.485198	0.862441	1.1595	8.10216e-05	1.77589	0.563098	A0A024R462;B7ZLE5;Q6MZM7;Q6N084;Q59G22;Q68CX6;B4DU16;Q6PJE5;B4DN21	A0A024R462;B7ZLE5;Q6MZM7	FN1 DKFZp686O12165	>tr|A0A024R462|A0A024R462_HUMAN Fibronectin 1, isoform CRA_n OS=Homo sapiens GN=FN1 PE=4 SV=1;>tr|B7ZLE5|B7ZLE5_HUMAN FN1 protein OS=Homo sapiens GN=FN1 PE=2 SV=1;>tr|Q6MZM7|Q6MZM7_HUMAN Putative uncharacterized protein DKFZp686O12165 (Fragment) OS=Homo sa
Alpha-1-acid glycoprotein;Alpha-1-acid glycoprotein 1	13	72288600000	53170900000	55212000000	61509200000	41826900000	3.03948e-08	2.36529e-09	0.57861	1.72828	1.97194e-06	0.68001	1.47057	0.00128147	0.757569	1.32001	0.00288251	0.78665	1.27121	0.225446	0.897622	1.11405	0.00339341	0.763772	1.30929	0.64672	1.03839	0.963032	0.0493489	0.850884	1.17525	0.0554309	1.15682	0.864438	3.20283e-05	1.35955	0.735536	V9HWF6;P02763	V9HWF6;P02763	HEL-S-153w ORM1	>tr|V9HWF6|V9HWF6_HUMAN Alpha-1-acid glycoprotein OS=Homo sapiens GN=HEL-S-153w PE=2 SV=1;>sp|P02763|A1AG1_HUMAN Alpha-1-acid glycoprotein 1 OS=Homo sapiens GN=ORM1 PE=1 SV=1
Apolipoprotein C-IV	2	33616500	26732800	173347000	52733600	13332600	3.63601e-08	0.353116	0.396609	2.52138	0.0781072	0.252829	3.95524	1.39568e-05	0.0769128	13.0017	0.364847	0.498736	2.00507	0.00466304	3.28722	0.304208	0.000770017	5.1566	0.193926	1.10997e-07	6.48443	0.154216	0.522036	1.56868	0.637478	0.189025	1.97262	0.506941	0.718687	1.2575	0.795229	A5YAK2	A5YAK2	APOC4	>tr|A5YAK2|A5YAK2_HUMAN Apolipoprotein C-IV OS=Homo sapiens GN=APOC4 PE=2 SV=1
Beta-2-glycoprotein 1	27	27858600000	20504100000	20568200000	26228600000	17001400000	1.43163e-07	9.54025e-08	0.610275	1.63861	4.31159e-07	0.648201	1.54273	0.0233082	0.826587	1.20979	0.0346439	0.829171	1.20602	0.00771942	0.78419	1.2752	0.00145809	0.738307	1.35445	0.972774	1.00313	0.996884	0.465794	0.94149	1.06215	0.00293542	1.27919	0.781746	0.000161587	1.35868	0.736006	D9IWP9;P02749;B4DPN0;J3QLI0;J3QRN2;J3KS17;CON__P17690	D9IWP9;P02749;B4DPN0	APOH	>tr|D9IWP9|D9IWP9_HUMAN Beta-2-glycoprotein I (Fragment) OS=Homo sapiens PE=2 SV=1;>sp|P02749|APOH_HUMAN Beta-2-glycoprotein 1 OS=Homo sapiens GN=APOH PE=1 SV=3;>tr|B4DPN0|B4DPN0_HUMAN cDNA FLJ51265, moderately similar to Beta-2-glycoprotein 1 (Beta-2-glyc
Attractin	23	380021000	347673000	692011000	356481000	560958000	2.14437e-07	0.00542259	1.47612	0.67745	0.00563238	1.5736	0.635486	0.0470726	0.81062	1.23362	0.00105941	1.61346	0.619784	1.62845e-05	1.94123	0.515138	4.76506e-06	1.82098	0.549155	8.72752e-07	1.99041	0.50241	0.732399	0.938056	1.06603	0.896656	1.02533	0.975292	0.604506	1.09304	0.914878	O75882;B4DZ36	O75882;B4DZ36	ATRN	>sp|O75882|ATRN_HUMAN Attractin OS=Homo sapiens GN=ATRN PE=1 SV=2;>tr|B4DZ36|B4DZ36_HUMAN cDNA FLJ58441, highly similar to Attractin OS=Homo sapiens PE=2 SV=1
Serum paraoxonase/arylesterase 1	22	4099700000	4791430000	6841900000	4146010000	5790200000	3.94917e-07	5.86397e-05	1.41235	0.708041	0.000306319	1.39657	0.716039	0.0366453	0.846285	1.18163	0.0246497	1.20845	0.827507	2.16101e-05	1.65024	0.605973	3.99299e-06	1.66888	0.599205	0.000132738	1.42795	0.700307	0.923007	1.0113	0.98883	0.187181	0.865297	1.15567	0.132663	0.855632	1.16873	P27169;B4DX19;F8WF42;Q96P89;B1PWC6;Q96P90	P27169;B4DX19	PON1	>sp|P27169|PON1_HUMAN Serum paraoxonase/arylesterase 1 OS=Homo sapiens GN=PON1 PE=1 SV=3;>tr|B4DX19|B4DX19_HUMAN cDNA FLJ57644, highly similar to Serum paraoxonase/arylesterase 1 (EC 3.1.1.2) OS=Homo sapiens PE=2 SV=1
Corticosteroid-binding globulin	18	1162770000	1117310000	1984920000	1683850000	2257820000	4.27839e-07	0.0399883	1.34087	0.745786	0.000185781	1.94176	0.514997	0.280269	1.13749	0.879131	1.55943e-06	2.02076	0.494862	0.00128745	1.70706	0.585802	0.22749	1.1788	0.848321	0.000126774	1.77652	0.562899	0.0592788	0.690543	1.44814	0.841762	1.04069	0.960904	0.0123139	1.50706	0.663545	P08185;B2R9F2;G3V350;G3V4V7	P08185;B2R9F2;G3V350	SERPINA6	>sp|P08185|CBG_HUMAN Corticosteroid-binding globulin OS=Homo sapiens GN=SERPINA6 PE=1 SV=1;>tr|B2R9F2|B2R9F2_HUMAN cDNA, FLJ94361, highly similar to Homo sapiens serine (or cysteine) proteinase inhibitor, clade A(alpha-1 antiproteinase, antitrypsin), membe
Afamin	54	5408340000	6820390000	7213900000	5634990000	6758990000	4.86116e-07	8.91158e-07	1.24973	0.80017	0.000289706	1.19947	0.833703	0.184878	0.93694	1.0673	0.849997	0.990998	1.00908	0.000323301	1.2802	0.781129	7.57586e-06	1.33385	0.749711	0.306491	1.0577	0.945451	0.483084	1.04191	0.959778	0.00143181	0.826198	1.21036	5.11919e-05	0.792966	1.26109	P43652;CON__REFSEQ:XP_585019	P43652	AFM	>sp|P43652|AFAM_HUMAN Afamin OS=Homo sapiens GN=AFM PE=1 SV=1
Beta-Ala-His dipeptidase	22	44112300	122660000	213499000	69996100	175602000	7.48308e-07	6.51921e-07	3.98079	0.251206	0.000537829	2.50874	0.398607	0.211212	0.822496	1.21581	0.0820691	1.43162	0.698511	2.14842e-05	3.05016	0.327852	1.03787e-08	4.8399	0.206616	0.00589597	1.74058	0.574523	0.285858	1.58677	0.630211	0.0972441	0.570651	1.75238	0.00706101	0.359631	2.78063	A8K1K1;J3KRP0;Q96KN2;B4E180	A8K1K1;J3KRP0;Q96KN2;B4E180	CNDP1	>tr|A8K1K1|A8K1K1_HUMAN cDNA FLJ76342, highly similar to Homo sapiens carnosine dipeptidase 1 (metallopeptidase M20 family)(CNDP1), mRNA OS=Homo sapiens PE=2 SV=1;>tr|J3KRP0|J3KRP0_HUMAN Beta-Ala-His dipeptidase OS=Homo sapiens GN=CNDP1 PE=4 SV=2;>sp|Q96KN
Coagulation factor V;Coagulation factor V heavy chain;Coagulation factor V light chain	33	153196000	227779000	301237000	249780000	146148000	7.62467e-07	0.761542	0.953994	1.04823	0.000140898	0.585107	1.70909	0.000124242	0.48516	2.06118	0.000191202	0.641622	1.55855	0.224483	1.20601	0.829181	0.000371506	1.96635	0.508556	0.0150974	1.3225	0.756145	0.000858197	1.63046	0.613324	0.354131	1.09659	0.911918	0.00100174	0.672564	1.48685	P12259;Q2I258;B4DU26;Q1L610;Q2HZZ0;Q8TD21;Q2HZY9	P12259	F5	>sp|P12259|FA5_HUMAN Coagulation factor V OS=Homo sapiens GN=F5 PE=1 SV=4
Ras-related protein Rap-1b	4	0	0	0	0	23548700	7.86679e-07	0.0100516	n/a	0	0.0144026	n/a	0	0.0162511	n/a	0	6.48329e-05	n/a	0	1	n/a	n/a	1	n/a	n/a	1	n/a	n/a	1	n/a	n/a	1	n/a	n/a	1	n/a	n/a	A0A024RB87;P61224;F5H823;B7ZB78;F5GZG1;B7ZAY2;E7ESV4;F5H7Y6;A6NIZ1;F5H6R7;F5H004;F5GX62;Q9BXV4;Q5U0C3;A8KAH9;A2IRN0;P62834;F8WBC0;F5H4H0;F5GYH7;F5H077;F5GWU8;F5H491;F5H0B7;F5H500;A0A075B6Q0;F5GYB5	A0A024RB87;P61224;F5H823;B7ZB78;F5GZG1;B7ZAY2;E7ESV4;F5H7Y6;A6NIZ1;F5H6R7;F5H004;F5GX62;Q9BXV4;Q5U0C3;A8KAH9;A2IRN0;P62834	RAP1B RAP1A Raichu404X	>tr|A0A024RB87|A0A024RB87_HUMAN RAP1B, member of RAS oncogene family, isoform CRA_a OS=Homo sapiens GN=RAP1B PE=4 SV=1;>sp|P61224|RAP1B_HUMAN Ras-related protein Rap-1b OS=Homo sapiens GN=RAP1B PE=1 SV=1;>tr|F5H823|F5H823_HUMAN Ras-related protein Rap-1b (
Angiotensinogen;Angiotensin-1;Angiotensin-2;Angiotensin-3;Angiotensin-4;Angiotensin 1-9;Angiotensin 1-7;Angiotensin 1-5;Angiotensin 1-4	2	4806390000	3732510000	5920000000	3643970000	5565790000	8.06391e-07	0.18796	1.158	0.863559	0.000403211	1.5274	0.654708	0.489985	0.940167	1.06364	4.81814e-05	1.49117	0.670616	4.18696e-05	1.6246	0.615535	0.0601589	1.23169	0.81189	3.73178e-06	1.58606	0.630492	0.0495765	0.758151	1.319	0.842198	0.976279	1.0243	0.0222485	1.28771	0.776572	B0ZBE2;P01019;B2R5S1;B4DE80	B0ZBE2;P01019;B2R5S1;B4DE80	AGT	>tr|B0ZBE2|B0ZBE2_HUMAN Angiotensinogen (Serpin peptidase inhibitor, clade A, member 8) OS=Homo sapiens GN=AGT PE=3 SV=1;>sp|P01019|ANGT_HUMAN Angiotensinogen OS=Homo sapiens GN=AGT PE=1 SV=1;>tr|B2R5S1|B2R5S1_HUMAN cDNA, FLJ92595, highly similar to Homo s
Inter-alpha-trypsin inhibitor heavy chain H1	2	10698500000	9433290000	12704900000	9159890000	11270600000	8.29632e-07	0.361642	1.05347	0.94924	0.00164012	1.23043	0.812724	0.0382262	0.887107	1.12726	0.00082631	1.19477	0.836982	0.000105145	1.38701	0.720973	0.0171703	1.18754	0.842077	1.86497e-06	1.34682	0.742492	0.0538249	0.856185	1.16797	0.662023	0.971018	1.02985	0.0371661	1.13412	0.881739	P19827;B7Z549;Q9P1C5;H7C0N0;H7C5I0	P19827;B7Z549	ITIH1	>sp|P19827|ITIH1_HUMAN Inter-alpha-trypsin inhibitor heavy chain H1 OS=Homo sapiens GN=ITIH1 PE=1 SV=3;>tr|B7Z549|B7Z549_HUMAN cDNA FLJ56821, highly similar to Inter-alpha-trypsin inhibitor heavy chain H1 OS=Homo sapiens PE=2 SV=1
Apolipoprotein A-I;Proapolipoprotein A-I;Truncated apolipoprotein A-I	56	105140000000	97235000000	220102000000	102517000000	193776000000	9.16941e-07	0.00963841	1.84303	0.542585	0.000751701	1.89018	0.529049	0.140971	0.880392	1.13586	0.000144777	1.99286	0.501791	0.000146362	2.14698	0.46577	0.01128	2.09342	0.477688	3.02608e-06	2.26361	0.441772	0.219143	0.975052	1.02559	0.729823	1.05432	0.948477	0.0811687	1.0813	0.924815	A0A024R3E3;P02647;F8W696;Q9Y355;Q8TDB0	A0A024R3E3;P02647;F8W696	APOA1	>tr|A0A024R3E3|A0A024R3E3_HUMAN Apolipoprotein A-I, isoform CRA_a OS=Homo sapiens GN=APOA1 PE=4 SV=1;>sp|P02647|APOA1_HUMAN Apolipoprotein A-I OS=Homo sapiens GN=APOA1 PE=1 SV=1;>tr|F8W696|F8W696_HUMAN Truncated apolipoprotein A-I OS=Homo sapiens GN=APOA1
Insulin-like growth factor-binding protein complex acid labile subunit	28	762430000	764053000	1043930000	734471000	1049390000	1.76806e-06	2.75535e-05	1.37638	0.726546	4.6147e-05	1.42877	0.699903	0.949656	1.00523	0.994797	6.43588e-06	1.37345	0.728093	0.00386255	1.42134	0.703563	0.00394146	1.36921	0.730346	0.000399523	1.36631	0.731901	0.728066	0.963329	1.03807	0.670126	0.961283	1.04028	0.979781	0.997876	1.00213	Q8TAY0;B0AZL7;P35858	Q8TAY0;B0AZL7;P35858	IGFALS	>tr|Q8TAY0|Q8TAY0_HUMAN Insulin-like growth factor binding protein, acid labile subunit OS=Homo sapiens GN=IGFALS PE=2 SV=1;>tr|B0AZL7|B0AZL7_HUMAN cDNA, FLJ79457, highly similar to Insulin-like growth factor-binding proteincomplex acid labile chain OS=Hom
Alpha-1-acid glycoprotein 2	13	28407200000	20837100000	23452700000	23677100000	18605500000	2.22969e-06	5.91664e-07	0.654957	1.52682	0.00213431	0.785801	1.27259	0.00026998	0.79332	1.26053	0.143643	0.892903	1.11994	0.900808	0.990522	1.00957	0.0144943	0.82559	1.21125	0.11879	1.12553	0.888473	0.0333065	0.833489	1.19978	0.10796	1.1363	0.880053	3.96274e-05	1.3633	0.733515	P19652	P19652	ORM2	>sp|P19652|A1AG2_HUMAN Alpha-1-acid glycoprotein 2 OS=Homo sapiens GN=ORM2 PE=1 SV=2
von Willebrand factor	2	263257000	7632280	174764000	135125000	0	3.83377e-06	0.000333596	0	n/a	0.016693	0	n/a	0.0160886	0	n/a	0.072924	0	n/a	0.677008	1.29335	0.773186	0.390654	0.663853	1.50636	0.000350654	22.898	0.0436719	0.165215	0.513282	1.94825	0.000466982	17.7044	0.0564831	8.536e-08	34.4926	0.0289917	L8E853	L8E853	VWF	>tr|L8E853|L8E853_HUMAN von Willebrand factor OS=Homo sapiens GN=VWF PE=4 SV=1
Rheumatoid factor RF-IP4	3	1528190	0	21968100	0	1253480	4.448e-06	0.889926	0.820238	1.21916	0.346337	n/a	0	0.0190546	0.0570591	17.5257	0.120351	n/a	0	0.017125	n/a	0	0.0213487	14.3752	0.069564	9.63649e-05	n/a	0	0.346337	0	n/a	1	n/a	n/a	0.120351	n/a	0	A2J1M5	A2J1M5		>tr|A2J1M5|A2J1M5_HUMAN Rheumatoid factor RF-IP4 (Fragment) OS=Homo sapiens PE=1 SV=1
Inter-alpha-trypsin inhibitor heavy chain H2	34	22176000000	22551400000	25898700000	19501100000	24237600000	5.69529e-06	0.0487974	1.09297	0.914942	7.0403e-07	1.24288	0.80458	0.164119	0.935862	1.06853	0.0556881	1.07477	0.93043	1.24314e-05	1.32806	0.752976	0.0118564	1.16787	0.856259	0.0030366	1.14843	0.870754	0.0253746	0.879379	1.13717	0.0019476	0.86474	1.15642	0.707153	0.983354	1.01693	A2RTY6;P19823;Q5T985;A0A087WTE1;D3DRR6;B4DM79;Q5T987	A2RTY6;P19823;Q5T985;A0A087WTE1;D3DRR6;B4DM79	ITIH2	>tr|A2RTY6|A2RTY6_HUMAN Inter-alpha (Globulin) inhibitor H2 OS=Homo sapiens GN=ITIH2 PE=2 SV=1;>sp|P19823|ITIH2_HUMAN Inter-alpha-trypsin inhibitor heavy chain H2 OS=Homo sapiens GN=ITIH2 PE=1 SV=2;>tr|Q5T985|Q5T985_HUMAN Inter-alpha-trypsin inhibitor heav
Proteoglycan 4;Proteoglycan 4 C-terminal part	10	2292610	17505100	47792800	19312000	2107290	6.47576e-06	0.952741	0.919166	1.08794	0.020081	0.109118	9.16438	4.78508e-06	0.0440922	22.6797	0.0412256	0.120381	8.30693	0.0190003	2.47477	0.404078	5.7124e-06	20.8465	0.0479698	0.00218865	2.73022	0.366271	0.0224911	8.42359	0.118714	0.838847	1.10322	0.906436	0.0442973	0.130968	7.63545	A0A024R930;Q92954;B3KQ20;B4DW29;B7Z759;E9PLR3	A0A024R930;Q92954;B3KQ20	PRG4	>tr|A0A024R930|A0A024R930_HUMAN Proteoglycan 4, isoform CRA_a OS=Homo sapiens GN=PRG4 PE=4 SV=1;>sp|Q92954|PRG4_HUMAN Proteoglycan 4 OS=Homo sapiens GN=PRG4 PE=1 SV=2;>tr|B3KQ20|B3KQ20_HUMAN cDNA FLJ32635 fis, clone SYNOV2000178, highly similar to Proteogl
V1-5 protein	4	322535000	342690000	232822000	282156000	922202000	9.51627e-06	0.00170274	2.85923	0.349744	0.00109385	3.26841	0.305959	0.000179537	3.96097	0.252463	3.72078e-05	2.69107	0.3716	0.677439	0.825153	1.2119	0.466316	0.72185	1.38533	0.302984	0.679395	1.4719	0.77945	0.874807	1.14311	0.601787	0.823356	1.21454	0.859651	0.941186	1.06249	Q5NV65;A0A075B6J9	Q5NV65;A0A075B6J9	V1-5 IGLV2-18	>tr|Q5NV65|Q5NV65_HUMAN V1-5 protein (Fragment) OS=Homo sapiens GN=V1-5 PE=4 SV=1;>tr|A0A075B6J9|A0A075B6J9_HUMAN HCG1782423 (Fragment) OS=Homo sapiens GN=IGLV2-18 PE=4 SV=1
Lymphatic vessel endothelial hyaluronic acid receptor 1	3	23333900	0	0	0	0	1.63538e-05	0.0210081	0	n/a	1	n/a	n/a	1	n/a	n/a	1	n/a	n/a	1	n/a	n/a	0.0312464	0	n/a	1	n/a	n/a	0.0282776	0	n/a	1	n/a	n/a	0.000332272	n/a	0	B2R672;Q9Y5Y7	B2R672;Q9Y5Y7	XLKD1 LYVE1	>tr|B2R672|B2R672_HUMAN Extracellular link domain containing 1 OS=Homo sapiens GN=XLKD1 PE=2 SV=1;>sp|Q9Y5Y7|LYVE1_HUMAN Lymphatic vessel endothelial hyaluronic acid receptor 1 OS=Homo sapiens GN=LYVE1 PE=1 SV=2
Apolipoprotein E	26	3451240000	1545050000	3936860000	2713940000	3089150000	1.77954e-05	0.268622	0.895084	1.11721	0.242305	1.13825	0.878539	0.00389655	0.784674	1.27442	0.0120643	1.99939	0.500154	0.00408803	1.45061	0.689367	0.238307	1.14071	0.876648	8.75534e-07	2.54805	0.392457	0.0914588	0.786367	1.27167	0.546358	1.75654	0.569301	0.00138892	2.23374	0.44768	P02649;J9ZVQ3;H0Y7L5;E9PEV4;E7ERP7;Q6LBZ1;D9ZB55;Q6LA97;CON__Q03247;Q6ZP45;Q13791	P02649;J9ZVQ3;H0Y7L5;E9PEV4;E7ERP7;Q6LBZ1	APOE	>sp|P02649|APOE_HUMAN Apolipoprotein E OS=Homo sapiens GN=APOE PE=1 SV=1;>tr|J9ZVQ3|J9ZVQ3_HUMAN Apolipoprotein E (Fragment) OS=Homo sapiens GN=APOE PE=4 SV=1;>tr|H0Y7L5|H0Y7L5_HUMAN Apolipoprotein E (Fragment) OS=Homo sapiens GN=APOE PE=1 SV=2;>tr|E9PEV4|
Fibulin-1	6	702478000	587269000	537711000	721339000	491835000	1.90785e-05	3.37148e-05	0.700143	1.42828	0.000176121	0.681836	1.46663	0.266492	0.914683	1.09328	0.017262	0.837495	1.19404	0.00496966	0.745435	1.3415	0.00240454	0.765449	1.30642	0.251512	0.915613	1.09216	0.773307	1.02685	0.973853	0.00800343	1.22829	0.814137	0.00975896	1.19618	0.835996	B4DUV1;B1AHL2	B4DUV1;B1AHL2	FBLN1	>tr|B4DUV1|B4DUV1_HUMAN Fibulin-1 OS=Homo sapiens PE=2 SV=1;>tr|B1AHL2|B1AHL2_HUMAN Fibulin-1 OS=Homo sapiens GN=FBLN1 PE=3 SV=1
Thyroxine-binding globulin	21	848432000	684153000	905857000	603631000	987461000	2.39662e-05	0.0643444	1.16387	0.859206	6.28288e-07	1.63587	0.611296	0.231353	1.09008	0.91736	0.000192525	1.44333	0.692841	0.000610606	1.50068	0.666365	0.512758	1.06768	0.936607	0.012598	1.32406	0.755255	0.00690688	0.711467	1.40555	0.35356	0.882304	1.1334	0.0561483	1.24012	0.806373	P05543;CON__Q9TT36	P05543	SERPINA7	>sp|P05543|THBG_HUMAN Thyroxine-binding globulin OS=Homo sapiens GN=SERPINA7 PE=1 SV=2
Complement C1q subcomponent subunit A	8	611091000	372195000	511465000	583975000	513008000	2.56426e-05	0.0877065	0.839495	1.19119	0.20198	0.878476	1.13834	0.973613	1.00302	0.996992	0.0217603	1.37833	0.725515	0.136504	0.875834	1.14177	0.0562168	0.83697	1.19479	0.0253781	1.37419	0.727704	0.646579	0.955627	1.04643	0.00116582	1.569	0.637347	0.000191563	1.64186	0.609066	A0A024RAG6;P02745;X6RLJ0;Q9H2L7	A0A024RAG6;P02745;X6RLJ0	C1QA	>tr|A0A024RAG6|A0A024RAG6_HUMAN Complement component 1, q subcomponent, A chain, isoform CRA_a OS=Homo sapiens GN=C1QA PE=4 SV=1;>sp|P02745|C1QA_HUMAN Complement C1q subcomponent subunit A OS=Homo sapiens GN=C1QA PE=1 SV=2;>tr|X6RLJ0|X6RLJ0_HUMAN Complemen
Vitamin K-dependent protein C;Vitamin K-dependent protein C light chain;Vitamin K-dependent protein C heavy chain;Activation peptide	5	27207700	28106300	96458600	30438900	49718400	4.72518e-05	0.167536	1.82737	0.547236	0.261653	1.63338	0.612226	0.020713	0.515438	1.9401	0.100206	1.76894	0.56531	0.00103768	3.16893	0.315564	0.000312552	3.54527	0.282066	6.37552e-06	3.43192	0.291382	0.832259	1.11876	0.893846	0.856151	1.08299	0.923368	0.941315	0.968029	1.03303	B4DPC8;B4E1C4;E7END6;B4DPQ3;P04070;Q8J006;H7BYX9;Q6V7X9;Q8IXB4;Q8J008;Q8J007;Q6SPC0;Q8J009;Q6V7X8	B4DPC8;B4E1C4;E7END6;B4DPQ3;P04070;Q8J006;H7BYX9;Q6V7X9;Q8IXB4;Q8J008;Q8J007;Q6SPC0;Q8J009	PROC PROC1	>tr|B4DPC8|B4DPC8_HUMAN cDNA FLJ51023, highly similar to Vitamin K-dependent protein C (EC 3.4.21.69) OS=Homo sapiens PE=2 SV=1;>tr|B4E1C4|B4E1C4_HUMAN cDNA FLJ51179, highly similar to Vitamin K-dependent protein C (EC 3.4.21.69) OS=Homo sapiens PE=2 SV=1;
Phosphatidylinositol-glycan-specific phospholipase D	20	164765000	196965000	348149000	142397000	275238000	4.79097e-05	0.00282417	1.67049	0.598627	0.000994257	1.93289	0.51736	0.0765973	0.790575	1.2649	0.0557895	1.3974	0.715617	3.309e-05	2.44492	0.409012	5.9484e-05	2.113	0.47326	0.00108399	1.76757	0.565749	0.579183	0.864243	1.15708	0.213574	0.722956	1.38321	0.435285	0.836519	1.19543	P80108	P80108	GPLD1	>sp|P80108|PHLD_HUMAN Phosphatidylinositol-glycan-specific phospholipase D OS=Homo sapiens GN=GPLD1 PE=1 SV=3
Fetuin-B	8	56950800	98071500	100900000	49752500	140312000	6.05195e-05	0.000241973	2.46374	0.405887	9.01994e-05	2.8202	0.354585	0.0468169	1.3906	0.719112	0.040073	1.43071	0.698953	0.000290193	2.08039	0.493087	0.000848131	2.02804	0.564428	0.120628	1.02884	0.971967	0.714467	0.873605	1.14468	0.0185268	0.507308	1.97119	0.0382824	0.580707	1.72204	Q9UGM5;Q5J875;E9PG08;B7Z8T3;C9JC68;F8WEP7	Q9UGM5;Q5J875;E9PG08	FETUB GUGU	>sp|Q9UGM5|FETUB_HUMAN Fetuin-B OS=Homo sapiens GN=FETUB PE=1 SV=2;>tr|Q5J875|Q5J875_HUMAN GUGU gamma form OS=Homo sapiens GN=GUGU PE=2 SV=1;>tr|E9PG08|E9PG08_HUMAN Fetuin-B OS=Homo sapiens GN=FETUB PE=4 SV=1
Plasma serine protease inhibitor	12	125867000	80386400	192665000	86925300	85128400	7.24574e-05	0.132437	0.676336	1.47855	0.951578	0.979328	1.02111	0.000166114	0.441847	2.26323	0.823847	1.05899	0.944296	0.00125184	2.21644	0.451173	0.0207178	1.5307	0.653295	2.49566e-06	2.39674	0.417234	0.209903	0.690612	1.44799	0.783247	1.08134	0.924776	0.0401837	1.56577	0.638661	A0A024R6N9;P05154;B4DPC7;G3V5Q9;B3KTV6;G3V2M1;B4DDH1;G3V264;G3V482;G3V265;G3V3F5;G3V5I3;G3V4B4	A0A024R6N9;P05154;B4DPC7;G3V5Q9;B3KTV6;G3V2M1;B4DDH1	SERPINA5	>tr|A0A024R6N9|A0A024R6N9_HUMAN Serpin peptidase inhibitor, clade A (Alpha-1 antiproteinase, antitrypsin), member 5, isoform CRA_a OS=Homo sapiens GN=SERPINA5 PE=3 SV=1;>sp|P05154|IPSP_HUMAN Plasma serine protease inhibitor OS=Homo sapiens GN=SERPINA5 PE=1
Carboxypeptidase N catalytic chain	13	376748000	367264000	548073000	363774000	513040000	8.4663e-05	0.000937735	1.36176	0.734344	0.00259126	1.41033	0.709056	0.316644	0.93608	1.06829	0.00234742	1.39692	0.715858	0.000725334	1.50663	0.663733	0.000173732	1.45475	0.687405	0.000506029	1.49231	0.670101	0.80828	0.965563	1.03567	0.948273	0.990497	1.00959	0.846905	1.02582	0.974827	P15169;B1AP58;CON__Q2KJ83	P15169	CPN1	>sp|P15169|CBPN_HUMAN Carboxypeptidase N catalytic chain OS=Homo sapiens GN=CPN1 PE=1 SV=1
Epididymis luminal protein 213	3	222646000	374976000	242757000	320877000	437482000	0.000109375	1.52097e-05	1.96492	0.508926	0.0162571	1.36339	0.733463	3.24465e-05	1.80214	0.554896	0.167957	1.16669	0.857123	0.157024	0.756542	1.3218	0.703611	1.09033	0.917156	0.00921504	0.647393	1.54466	0.0827443	1.4412	0.693867	0.287941	0.855727	1.1686	0.00217925	0.593761	1.68418	V9HW34	V9HW34	HEL-213	>tr|V9HW34|V9HW34_HUMAN Epididymis luminal protein 213 OS=Homo sapiens GN=HEL-213 PE=2 SV=1
Hemopexin	46	88626200000	100766000000	101778000000	93007300000	101095000000	0.000111312	0.000478228	1.14069	0.876663	0.0117937	1.08696	0.919999	0.80049	0.993289	1.00676	0.911662	1.00326	0.996746	0.010132	1.0943	0.913825	0.000539649	1.1484	0.87078	0.749353	1.01004	0.990057	0.263871	1.04943	0.952895	0.0196695	0.923003	1.08342	0.000346236	0.879525	1.13698	P02790;Q9BS19;B7Z8Q4	P02790;Q9BS19	HPX	>sp|P02790|HEMO_HUMAN Hemopexin OS=Homo sapiens GN=HPX PE=1 SV=2;>tr|Q9BS19|Q9BS19_HUMAN HPX protein OS=Homo sapiens GN=HPX PE=2 SV=1
Sulfhydryl oxidase 1;Sulfhydryl oxidase	15	25738000	0	0	7850710	0	0.000119576	0.01914	0	n/a	0.135937	0	n/a	1	n/a	n/a	1	n/a	n/a	0.164461	0	n/a	0.0287688	0	n/a	1	n/a	n/a	0.154501	0.305024	3.27843	0.0196816	n/a	0	0.000270365	n/a	0	O00391;A8K4C2;A8K477;Q13876;A8MXT8	O00391;A8K4C2;A8K477	QSOX1	>sp|O00391|QSOX1_HUMAN Sulfhydryl oxidase 1 OS=Homo sapiens GN=QSOX1 PE=1 SV=3;>tr|A8K4C2|A8K4C2_HUMAN Sulfhydryl oxidase OS=Homo sapiens PE=2 SV=1;>tr|A8K477|A8K477_HUMAN Sulfhydryl oxidase OS=Homo sapiens PE=2 SV=1
Monocyte differentiation antigen CD14;Monocyte differentiation antigen CD14;Monocyte differentiation antigen CD14, urinary form;Monocyte differentiation antigen CD14, membrane-bound form	9	101604000	42757600	55979400	78604000	27580000	0.000120546	0.000197509	0.271446	3.68397	0.00357473	0.350873	2.85004	0.0643539	0.492681	2.02971	0.260254	0.645032	1.55031	0.223505	0.71217	1.40416	0.0286727	0.550957	1.81502	0.36529	1.30923	0.76381	0.288695	0.773631	1.29261	0.0199128	1.83836	0.543962	0.000287052	2.37628	0.420826	B2R888;P08571;F1C4A7;D6RFL4	B2R888;P08571;F1C4A7;D6RFL4	CD14	>tr|B2R888|B2R888_HUMAN Monocyte differentiation antigen CD14 OS=Homo sapiens PE=2 SV=1;>sp|P08571|CD14_HUMAN Monocyte differentiation antigen CD14 OS=Homo sapiens GN=CD14 PE=1 SV=2;>tr|F1C4A7|F1C4A7_HUMAN Monocyte differentiation antigen CD14 OS=Homo sapi
Complement component C6	6	2307520000	2525000000	2126670000	2273300000	2178280000	0.000133074	0.15502	0.943992	1.05933	0.23922	0.958202	1.04362	0.529704	1.02427	0.976307	0.00157791	0.862685	1.15917	0.104781	0.935499	1.06895	0.0724929	0.921626	1.08504	0.000816699	0.842246	1.1873	0.725015	0.98517	1.01505	0.0284568	0.900317	1.11072	0.0545604	0.913869	1.09425	P13671;C9JC72	P13671	C6	>sp|P13671|CO6_HUMAN Complement component C6 OS=Homo sapiens GN=C6 PE=1 SV=3
Carboxypeptidase N subunit 2	19	828653000	881161000	1276110000	826088000	1125190000	0.000146488	0.000678585	1.35785	0.736456	0.000672615	1.36207	0.734176	0.132837	0.881734	1.13413	0.0222851	1.27694	0.783122	0.000279688	1.54476	0.647349	0.000212511	1.53998	0.649359	0.00153407	1.44821	0.690506	0.979383	0.996905	1.0031	0.631975	0.9375	1.06667	0.634296	0.94041	1.06337	P22792	P22792	CPN2	>sp|P22792|CPN2_HUMAN Carboxypeptidase N subunit 2 OS=Homo sapiens GN=CPN2 PE=1 SV=3
Serum amyloid A protein	4	707205000	2672690000	100069000	7241420000	203602000	0.000147375	0.00776455	0.287897	3.47347	0.0106305	0.0281163	35.5665	0.0144179	2.03462	0.491493	0.0120135	0.0761787	13.127	0.0156095	0.013819	72.3643	0.00291964	0.141499	7.06717	0.0146037	0.0374413	26.7085	0.0175299	10.2395	0.0976611	0.0231132	2.70941	0.369084	0.0458228	0.264604	3.77923	D3DQX7;E9PQD6	D3DQX7;E9PQD6	SAA1	>tr|D3DQX7|D3DQX7_HUMAN Serum amyloid A protein OS=Homo sapiens GN=SAA1 PE=3 SV=1;>tr|E9PQD6|E9PQD6_HUMAN Serum amyloid A protein OS=Homo sapiens GN=SAA1 PE=3 SV=1
Lipoprotein	2	647305000	1694080000	701460000	1072040000	287225000	0.000147425	0.0794271	0.443724	2.25365	0.00383277	0.267924	3.7324	0.0491407	0.409467	2.4422	0.000308249	0.169546	5.89809	0.290704	0.654323	1.5283	0.85352	1.08366	0.922797	0.0208587	0.414065	2.41508	0.203522	1.65616	0.603807	0.149336	0.632815	1.58024	0.00955249	0.382098	2.61713	Q1HP67;Q8N696;Q9UIR6;A0A087WWY0;Q9UIR8;Q9UIR7;Q9UKJ7;Q16609	Q1HP67	LPA	>tr|Q1HP67|Q1HP67_HUMAN Lipoprotein, Lp(A) OS=Homo sapiens GN=LPA PE=1 SV=1
Complement component C8 gamma chain	11	900909000	1099960000	955214000	1020370000	986889000	0.000164171	0.0489098	1.09544	0.912878	0.410353	0.967187	1.03393	0.572422	1.03316	0.967904	0.00622155	0.897204	1.11457	0.335227	0.936145	1.06821	0.419623	1.06028	0.943149	0.00780857	0.868408	1.15153	0.0313468	1.1326	0.882924	0.0915184	0.927643	1.078	3.49482e-05	0.819038	1.22094	P07360;Q5SQ08	P07360;Q5SQ08	C8G	>sp|P07360|CO8G_HUMAN Complement component C8 gamma chain OS=Homo sapiens GN=C8G PE=1 SV=3;>tr|Q5SQ08|Q5SQ08_HUMAN Complement component C8 gamma chain (Fragment) OS=Homo sapiens GN=C8G PE=3 SV=1
Vitamin K-dependent protein S	11	2306590000	2487940000	2838680000	2930750000	2596610000	0.000200221	0.00900004	1.12574	0.888308	0.00922794	0.885988	1.12868	0.0236328	0.914724	1.09323	0.453607	1.04368	0.958149	0.481943	0.968585	1.03243	1.47361e-05	1.23068	0.812557	0.024802	1.14098	0.876443	1.27113e-05	1.2706	0.787031	0.00596586	1.17798	0.848909	0.218814	0.927108	1.07862	P07225;Q9NSD0;Q16519;G5E9F8;H7BXT0;CON__P07224;Q8IXD0;Q8J011;Q8J010;Q8IXD3;C9K0R0	P07225;Q9NSD0;Q16519;G5E9F8	PROS1	>sp|P07225|PROS_HUMAN Vitamin K-dependent protein S OS=Homo sapiens GN=PROS1 PE=1 SV=1;>tr|Q9NSD0|Q9NSD0_HUMAN Protein S OS=Homo sapiens PE=2 SV=1;>tr|Q16519|Q16519_HUMAN Protein S (Fragment) OS=Homo sapiens GN=PROS1 PE=4 SV=1;>tr|G5E9F8|G5E9F8_HUMAN Prote
Protein Z-dependent protease inhibitor	2	8520100	38660500	72842300	30851200	33472300	0.000285126	0.0178766	3.92863	0.254542	0.837409	1.08496	0.921693	0.00737991	0.459517	2.1762	0.675533	0.865801	1.155	0.00431804	2.36108	0.423534	6.67723e-07	8.54947	0.116966	0.0123686	1.88415	0.530742	0.0260275	3.62099	0.276168	0.53926	0.798003	1.25313	0.00906653	0.220383	4.53756	A0A024R6I6;G3V2W1;Q9UK55;CON__ENSEMBL:ENSBTAP00000013050	A0A024R6I6;G3V2W1;Q9UK55	SERPINA10	>tr|A0A024R6I6|A0A024R6I6_HUMAN Serpin peptidase inhibitor, clade A (Alpha-1 antiproteinase, antitrypsin), member 10, isoform CRA_b OS=Homo sapiens GN=SERPINA10 PE=3 SV=1;>tr|G3V2W1|G3V2W1_HUMAN Protein Z-dependent protease inhibitor OS=Homo sapiens GN=SER
Complement C1q subcomponent subunit C	8	1754130000	1232340000	1635190000	1495890000	1436880000	0.000303964	0.0304537	0.819141	1.22079	0.635264	0.960552	1.04107	0.134298	0.878724	1.13801	0.107563	1.16598	0.85765	0.312709	1.09312	0.914811	0.450752	0.932194	1.07274	0.00393983	1.3269	0.753637	0.0907568	0.852782	1.17263	0.0491083	1.21386	0.823817	0.000216885	1.42341	0.702536	A0A024RAA7;P02747	A0A024RAA7;P02747	C1QC	>tr|A0A024RAA7|A0A024RAA7_HUMAN Complement component 1, q subcomponent, C chain, isoform CRA_a OS=Homo sapiens GN=C1QC PE=4 SV=1;>sp|P02747|C1QC_HUMAN Complement C1q subcomponent subunit C OS=Homo sapiens GN=C1QC PE=1 SV=3
Haptoglobin;Haptoglobin alpha chain;Haptoglobin beta chain	25	375105000000	473377000000	387467000000	487228000000	134253000000	0.000316096	0.302261	0.357908	2.79402	3.92568e-05	0.275545	3.62918	0.0185139	0.346489	2.8861	0.000197813	0.283607	3.52601	0.0180451	0.795248	1.25747	0.786257	1.03296	0.968095	0.0346603	0.818517	1.22172	0.0350836	1.29891	0.769876	0.747588	1.02926	0.971572	0.0246762	0.792402	1.26199	P00738;J3QR68;H0Y300;J3QLC9;Q6NSB4;A0A087WU08;Q6PEJ8;B3KP77;H3BS21;J3KRH2;J3KSV1;J3QQI8;H3BMJ7	P00738;J3QR68;H0Y300;J3QLC9;Q6NSB4;A0A087WU08;Q6PEJ8;B3KP77	HP	>sp|P00738|HPT_HUMAN Haptoglobin OS=Homo sapiens GN=HP PE=1 SV=1;>tr|J3QR68|J3QR68_HUMAN Haptoglobin (Fragment) OS=Homo sapiens GN=HP PE=1 SV=1;>tr|H0Y300|H0Y300_HUMAN Haptoglobin OS=Homo sapiens GN=HP PE=1 SV=4;>tr|J3QLC9|J3QLC9_HUMAN Haptoglobin (Fragmen
Alpha-1B-glycoprotein	33	27482100000	33610000000	32811600000	31138700000	32667500000	0.000329694	0.00115523	1.18868	0.841267	0.349348	1.0491	0.953201	0.927829	0.995608	1.00441	0.459276	0.971958	1.02885	0.371882	1.05372	0.949015	0.00344007	1.19393	0.837573	0.574361	0.976245	1.02433	0.0435647	1.13305	0.882571	0.0850707	0.926471	1.07936	1.35354e-05	0.817676	1.22298	V9HWD8;P04217;B3KP79;M0R009;B3KWB5;Q7Z3U3;CON__Q2KJF1	V9HWD8;P04217;B3KP79;M0R009	HEL-S-163pA A1BG	>tr|V9HWD8|V9HWD8_HUMAN Epididymis secretory sperm binding protein Li 163pA OS=Homo sapiens GN=HEL-S-163pA PE=2 SV=1;>sp|P04217|A1BG_HUMAN Alpha-1B-glycoprotein OS=Homo sapiens GN=A1BG PE=1 SV=4;>tr|B3KP79|B3KP79_HUMAN cDNA FLJ31323 fis, clone LIVER2000037
Mannan-binding lectin serine protease 2;Mannan-binding lectin serine protease 2 A chain;Mannan-binding lectin serine protease 2 B chain	4	14321900	0	0	0	0	0.00033334	0.0446949	0	n/a	1	n/a	n/a	1	n/a	n/a	1	n/a	n/a	1	n/a	n/a	0.0610745	0	n/a	1	n/a	n/a	0.0564588	0	n/a	1	n/a	n/a	0.00175837	n/a	0	O00187	O00187	MASP2	>sp|O00187|MASP2_HUMAN Mannan-binding lectin serine protease 2 OS=Homo sapiens GN=MASP2 PE=1 SV=4
Complement component C8 alpha chain	23	1424640000	1595820000	1286880000	1574660000	1329920000	0.000360884	0.153663	0.933513	1.07122	0.00245562	0.844576	1.18403	0.563322	1.03345	0.967637	0.00191669	0.833377	1.19994	0.00602058	0.817243	1.22363	0.126208	0.903302	1.10705	0.0017304	0.806407	1.24007	0.104529	1.1053	0.904729	0.825364	0.98674	1.01344	0.0556568	0.892732	1.12016	P07357;Q05CV2	P07357;Q05CV2	C8A	>sp|P07357|CO8A_HUMAN Complement component C8 alpha chain OS=Homo sapiens GN=C8A PE=1 SV=2;>tr|Q05CV2|Q05CV2_HUMAN C8A protein (Fragment) OS=Homo sapiens GN=C8A PE=2 SV=1
Latent-transforming growth factor beta-binding protein 2	2	4496770	0	0	0	0	0.000366995	0.0458104	0	n/a	1	n/a	n/a	1	n/a	n/a	1	n/a	n/a	1	n/a	n/a	0.0624269	0	n/a	1	n/a	n/a	0.0577488	0	n/a	1	n/a	n/a	0.00185629	n/a	0	Q59EE6;G3V3X5;Q6AZ94;Q14767	Q59EE6;G3V3X5;Q6AZ94;Q14767	LTBP2	>tr|Q59EE6|Q59EE6_HUMAN Latent transforming growth factor beta binding protein 2 variant (Fragment) OS=Homo sapiens PE=2 SV=1;>tr|G3V3X5|G3V3X5_HUMAN Latent-transforming growth factor beta-binding protein 2 OS=Homo sapiens GN=LTBP2 PE=4 SV=1;>tr|Q6AZ94|Q6A
Apolipoprotein C-III	10	16633800000	10596400000	13729400000	16340400000	10299100000	0.00038177	9.18797e-05	0.619167	1.61507	0.00072538	0.630284	1.58659	0.192972	0.750149	1.33307	0.812725	0.971943	1.02887	0.39734	0.840212	1.19018	0.311901	0.825392	1.21155	0.121708	1.29567	0.771804	0.885766	0.982361	1.01796	0.000331444	1.54207	0.648479	5.01518e-05	1.56976	0.63704	A3KPE2;B0YIW2;P02656	A3KPE2;B0YIW2;P02656	APOC3	>tr|A3KPE2|A3KPE2_HUMAN Apolipoprotein C-III OS=Homo sapiens GN=APOC3 PE=2 SV=1;>tr|B0YIW2|B0YIW2_HUMAN Apolipoprotein C-III OS=Homo sapiens GN=APOC3 PE=1 SV=1;>sp|P02656|APOC3_HUMAN Apolipoprotein C-III OS=Homo sapiens GN=APOC3 PE=1 SV=1
Galectin-3-binding protein	13	224838000	184960000	310614000	228636000	374403000	0.000385729	0.00176936	1.66521	0.600524	0.00354597	1.63755	0.610668	0.334614	1.20536	0.829625	6.6244e-06	2.02424	0.494013	0.236767	1.35855	0.736078	0.19372	1.3815	0.72385	0.0151014	1.67936	0.595466	0.936504	1.01689	0.983388	0.297411	1.23614	0.808971	0.317651	1.2156	0.822637	Q08380;B4DVE1;B4DWA8;B3KP88;B4DDG4;B4DI70;K7EP36;K7ESM3;K7EKQ5;K7ERZ6;K7EJD3;K7ES75;K7EN99;K7EJY8	Q08380;B4DVE1;B4DWA8;B3KP88;B4DDG4;B4DI70	LGALS3BP	>sp|Q08380|LG3BP_HUMAN Galectin-3-binding protein OS=Homo sapiens GN=LGALS3BP PE=1 SV=1;>tr|B4DVE1|B4DVE1_HUMAN cDNA FLJ53478, highly similar to Galectin-3-binding protein OS=Homo sapiens PE=2 SV=1;>tr|B4DWA8|B4DWA8_HUMAN cDNA FLJ53427, highly similar to G
Mannan-binding lectin serine protease 1;Mannan-binding lectin serine protease 1 heavy chain;Mannan-binding lectin serine protease 1 light chain	3	90919500	46518200	99252500	66508100	59930500	0.000392753	0.0691544	0.65916	1.51708	0.694126	0.901101	1.10975	0.0144977	0.603819	1.65613	0.304186	1.28832	0.776202	0.0352061	1.49234	0.67009	0.5945	1.09165	0.916042	6.87232e-05	2.13363	0.468685	0.147453	0.731505	1.36704	0.131434	1.42972	0.699437	0.000893682	1.95449	0.511642	P48740	P48740	MASP1	>sp|P48740|MASP1_HUMAN Mannan-binding lectin serine protease 1 OS=Homo sapiens GN=MASP1 PE=1 SV=3
N-acetylmuramoyl-L-alanine amidase	26	2062320000	2623590000	2512320000	2403880000	2352410000	0.000407043	0.0254848	1.14066	0.876684	0.692555	0.978589	1.02188	0.269585	0.93635	1.06798	0.0277117	0.896638	1.11528	0.521622	1.04511	0.956837	0.00771493	1.2182	0.820883	0.435886	0.957589	1.04429	0.0265617	1.16562	0.857913	0.107142	0.916256	1.0914	3.53657e-05	0.786068	1.27215	Q96PD5;M0R2W8;M0QYW3	Q96PD5	PGLYRP2	>sp|Q96PD5|PGRP2_HUMAN N-acetylmuramoyl-L-alanine amidase OS=Homo sapiens GN=PGLYRP2 PE=1 SV=1
Ceruloplasmin	2	57155000000	58198300000	62552600000	54465500000	68114100000	0.000442089	0.000271201	1.19174	0.839107	4.59594e-05	1.25059	0.799622	0.0414983	1.08891	0.91835	0.00132907	1.17038	0.854424	0.0100028	1.14848	0.870715	0.0546409	1.09444	0.913711	0.16521	1.07482	0.93039	0.398785	0.952944	1.04938	0.251182	0.935861	1.06854	0.731528	0.982073	1.01825	A5PL27;P00450;Q1L857;A8K5A4;B3KTA8;H7C5N5	A5PL27;P00450;Q1L857;A8K5A4;B3KTA8	CP	>tr|A5PL27|A5PL27_HUMAN CP protein OS=Homo sapiens GN=CP PE=2 SV=1;>sp|P00450|CERU_HUMAN Ceruloplasmin OS=Homo sapiens GN=CP PE=1 SV=1;>tr|Q1L857|Q1L857_HUMAN Ceruloplasmin (Fragment) OS=Homo sapiens PE=4 SV=1;>tr|A8K5A4|A8K5A4_HUMAN cDNA FLJ76826, highly
Complement C4-B;Complement C4 beta chain;Complement C4-B alpha chain;C4a anaphylatoxin;C4b-B;C4d-B;Complement C4 gamma chain	4	88379300000	73600100000	85692600000	78920300000	66032400000	0.000554303	1.23468e-05	0.747148	1.33842	0.038126	0.836697	1.19518	4.01615e-06	0.770573	1.29774	0.0687981	0.897178	1.11461	0.361758	1.08581	0.92097	0.655602	0.9696	1.03135	0.0148147	1.1643	0.858885	0.21616	0.892973	1.11986	0.350171	1.07229	0.932588	0.00347188	1.2008	0.832775	P0C0L5;F5GXS0;B4DIE5;B4DDH0;Q9UM89;Q6U2E0;Q6U2M2;Q6U2L6;Q6XMI6	P0C0L5;F5GXS0	C4B	>sp|P0C0L5|CO4B_HUMAN Complement C4-B OS=Homo sapiens GN=C4B PE=1 SV=2;>tr|F5GXS0|F5GXS0_HUMAN Complement C4-B OS=Homo sapiens GN=C4B PE=4 SV=1
Alpha-2-macroglobulin	129	212178000000	195571000000	270008000000	226046000000	261336000000	0.000722168	0.0134424	1.23168	0.811897	0.139407	1.15612	0.864963	0.648959	0.967882	1.03318	0.00102499	1.33627	0.748351	0.0896235	1.19448	0.837183	0.00761414	1.27255	0.785821	0.000578373	1.38061	0.724316	0.582366	1.06536	0.93865	0.179121	1.15583	0.865182	0.411815	1.08492	0.921731	P01023;H0YFH1;F8W7L3;Q9BQ22;F5H1E8	P01023	A2M	>sp|P01023|A2MG_HUMAN Alpha-2-macroglobulin OS=Homo sapiens GN=A2M PE=1 SV=3
Antithrombin-III	40	32358600000	29871000000	33910100000	29344100000	33748400000	0.000968806	0.314609	1.04295	0.958819	0.000289485	1.15009	0.869496	0.902644	0.995232	1.00479	0.00239982	1.1298	0.885109	0.00301875	1.1556	0.86535	0.354073	1.04795	0.954247	0.00550327	1.13522	0.880888	0.0510331	0.906841	1.10273	0.695602	0.982361	1.01796	0.0751549	1.08328	0.923124	A0A024R944;P01008;Q8TCE1;Q9UE54;Q8IZZ8;Q8J001;Q9UBW9;Q8IZZ9;Q8J000	A0A024R944;P01008	SERPINC1	>tr|A0A024R944|A0A024R944_HUMAN Serpin peptidase inhibitor, clade C (Antithrombin), member 1, isoform CRA_a OS=Homo sapiens GN=SERPINC1 PE=3 SV=1;>sp|P01008|ANT3_HUMAN Antithrombin-III OS=Homo sapiens GN=SERPINC1 PE=1 SV=1
Apolipoprotein B-100;Apolipoprotein B-48	256	64158600000	42151800000	57862900000	65605400000	39863600000	0.00116494	0.211496	0.621329	1.60945	0.113402	0.607627	1.64575	5.80639e-05	0.688932	1.45152	0.536112	0.945715	1.0574	0.0209468	0.881984	1.13381	0.00703619	0.901873	1.1088	0.000658475	1.37273	0.728477	0.743595	1.02255	0.977947	0.413877	1.55641	0.642505	0.617173	1.52208	0.656994	C0JYY2;P04114;E1A689;A0A087WTM7;Q59HB3;A8MUN2;S5FVK9;S5FMV1;E1B4S7;E1B4S9;E1B4S8;E1B4S6;Q13789;CON__ENSEMBL:ENSBTAP00000032840;Q9UE53;Q9UE51;S5FLF7;Q13828	C0JYY2;P04114;E1A689;A0A087WTM7	APOB	>tr|C0JYY2|C0JYY2_HUMAN Apolipoprotein B (Including Ag(X) antigen) OS=Homo sapiens GN=APOB PE=4 SV=1;>sp|P04114|APOB_HUMAN Apolipoprotein B-100 OS=Homo sapiens GN=APOB PE=1 SV=2;>tr|E1A689|E1A689_HUMAN Mutant Apo B 100 OS=Homo sapiens PE=2 SV=1;>tr|A0A087W
Kallistatin	23	821889000	640346000	1148460000	632864000	839709000	0.00136154	0.903732	1.02168	0.978778	0.104322	1.32684	0.753671	0.00384786	0.731161	1.36769	0.0768284	1.31134	0.762581	0.000593681	1.8147	0.551054	0.0493874	1.39734	0.715644	6.93309e-05	1.7935	0.557569	0.288092	0.770012	1.29868	0.953974	0.988316	1.01182	0.18007	1.28351	0.779115	B2R815;A0A024R6I9;P29622	B2R815;A0A024R6I9;P29622	SERPINA4	>tr|B2R815|B2R815_HUMAN cDNA, FLJ93695, highly similar to Homo sapiens serpin peptidase inhibitor, clade A (alpha-1 antiproteinase, antitrypsin), member 4 (SERPINA4), mRNA OS=Homo sapiens PE=2 SV=1;>tr|A0A024R6I9|A0A024R6I9_HUMAN Serpin peptidase inhibitor
Complement component C7	2	3452370000	2004640000	2051810000	2473300000	1965180000	0.00137692	0.000856965	0.569226	1.75677	0.00403561	0.794558	1.25856	0.392463	0.957779	1.04408	0.775789	0.980316	1.02008	0.0363214	0.829584	1.20542	0.0180939	0.594319	1.6826	0.761086	1.02353	0.977011	0.921812	0.716406	1.39586	0.00884757	1.23379	0.810512	0.0056566	1.72219	0.580656	P10643;A8K2T4	P10643;A8K2T4	C7	>sp|P10643|CO7_HUMAN Complement component C7 OS=Homo sapiens GN=C7 PE=1 SV=2;>tr|A8K2T4|A8K2T4_HUMAN cDNA FLJ78207, highly similar to Human complement protein component C7 mRNA OS=Homo sapiens PE=2 SV=1
Cholinesterase	8	32938100	30174900	91582600	39820000	49418700	0.00143475	0.348341	1.50035	0.666511	0.625552	1.24105	0.805768	0.0420974	0.539608	1.8532	0.165806	1.63774	0.610597	0.011633	2.29991	0.434799	0.00144771	2.78045	0.359655	3.49012e-05	3.03506	0.329483	0.683453	1.20893	0.827175	0.483563	1.31964	0.757783	0.823723	1.09157	0.916109	F8WF14;A0A024CIM4;D3DNN4;P06276;F8WEX7;H7C4Y0;H0Y885;Q96HL2;A0A024CHX5	F8WF14;A0A024CIM4;D3DNN4;P06276;F8WEX7	BCHE	>tr|F8WF14|F8WF14_HUMAN Cholinesterase OS=Homo sapiens GN=BCHE PE=3 SV=1;>tr|A0A024CIM4|A0A024CIM4_HUMAN Butyrylcholinesterase p.Val204Asp splice variant OS=Homo sapiens PE=3 SV=1;>tr|D3DNN4|D3DNN4_HUMAN Butyrylcholinesterase, isoform CRA_b OS=Homo sapiens
CRA_b	4	42921000000	48360500000	45313000000	47112600000	41536500000	0.00147192	0.363094	0.967743	1.03333	0.00258367	0.881643	1.13425	0.00816569	0.916657	1.09092	0.000961103	0.858893	1.16429	0.388289	0.961802	1.03971	0.189117	1.05573	0.947212	0.17086	0.936984	1.06725	0.051035	1.09766	0.91103	0.586739	0.974196	1.02649	0.0118335	0.887522	1.12673	A0A024R962;A0A024R984;Q5TFM2	A0A024R962;A0A024R984	hCG_40889	>tr|A0A024R962|A0A024R962_HUMAN HCG40889, isoform CRA_b OS=Homo sapiens GN=hCG_40889 PE=4 SV=1;>tr|A0A024R984|A0A024R984_HUMAN HCG40889, isoform CRA_a OS=Homo sapiens GN=hCG_40889 PE=4 SV=1
Adiponectin	4	185950000	47108500	153214000	121125000	90561900	0.001543	0.0749966	0.487023	2.05329	0.485114	0.747673	1.33748	0.13167	0.591081	1.69182	0.0231922	1.92241	0.52018	0.573614	1.26492	0.790561	0.612108	0.823953	1.21366	0.000266932	3.25236	0.307469	0.324091	0.651385	1.53519	0.0137844	2.57119	0.388925	0.000131285	3.94727	0.25334	A8K660;Q15848;B2R773	A8K660;Q15848;B2R773	ADIPOQ	>tr|A8K660|A8K660_HUMAN Adiponectin OS=Homo sapiens GN=ADIPOQ PE=2 SV=1;>sp|Q15848|ADIPO_HUMAN Adiponectin OS=Homo sapiens GN=ADIPOQ PE=1 SV=1;>tr|B2R773|B2R773_HUMAN cDNA, FLJ93312, highly similar to Homo sapiens adipose most abundant gene transcript 1 (A
Coagulation factor XII-	3	2096000000	2971960000	2711400000	3059480000	3219220000	0.00155466	0.000165468	1.53589	0.651089	0.627406	1.05221	0.950379	0.0762751	1.18729	0.842254	0.289659	1.0832	0.923193	0.325788	0.886229	1.12838	0.0446423	1.29361	0.773032	0.297744	0.912327	1.0961	0.00674953	1.45968	0.685084	0.745529	1.02945	0.971394	0.000419883	0.705258	1.41792	Q8IZZ5	Q8IZZ5		>tr|Q8IZZ5|Q8IZZ5_HUMAN Coagulation factor XII-Mie OS=Homo sapiens PE=2 SV=1
Plasma protease C1 inhibitor	31	12636700000	9650430000	13943800000	10669300000	10800600000	0.00167565	0.11228	0.854701	1.17	0.909783	1.01231	0.987843	0.000984998	0.774581	1.29102	0.282627	1.11918	0.893509	0.0143826	1.30691	0.765164	0.308988	1.10344	0.906259	0.000367258	1.44489	0.692095	0.180585	0.844311	1.1844	0.411754	1.10558	0.904505	0.0137266	1.30944	0.763683	E9KL26;P05155;H9KV48;E9PGN7;Q5UGI6;H0YCA1;CON__P50448	E9KL26;P05155;H9KV48;E9PGN7;Q5UGI6	SERPING1	>tr|E9KL26|E9KL26_HUMAN Epididymis tissue protein Li 173 OS=Homo sapiens PE=2 SV=1;>sp|P05155|IC1_HUMAN Plasma protease C1 inhibitor OS=Homo sapiens GN=SERPING1 PE=1 SV=2;>tr|H9KV48|H9KV48_HUMAN Plasma protease C1 inhibitor OS=Homo sapiens GN=SERPING1 PE=3
Serpin peptidase inhibitor, clade A	2	61668700	2516000	109720000	60677500	21930300	0.00181025	0.26844	0.355615	2.81203	0.299804	0.361424	2.76683	0.00636031	0.199875	5.00312	0.0285399	8.71634	0.114727	0.306912	1.80825	0.553021	0.295523	1.77918	0.562055	6.7449e-08	43.6089	0.0229311	0.984069	0.983927	1.01634	0.0112919	24.1167	0.0414651	0.00749264	24.5106	0.0407987	A0A024R6I7	A0A024R6I7	SERPINA1	>tr|A0A024R6I7|A0A024R6I7_HUMAN Serpin peptidase inhibitor, clade A (Alpha-1 antiproteinase, antitrypsin), member 1, isoform CRA_a OS=Homo sapiens GN=SERPINA1 PE=3 SV=1
V1-22 protein	3	783165000	1130370000	798284000	1297020000	868145000	0.00206678	0.499997	1.10851	0.902113	0.00732558	0.669338	1.49401	0.482982	1.08751	0.919528	0.0473115	0.768018	1.30205	0.00600067	0.615475	1.62476	0.916751	1.0193	0.981061	0.0230564	0.706215	1.416	0.00748283	1.65613	0.603819	0.30198	1.14743	0.871513	0.0182129	0.69284	1.44334	Q5NV88	Q5NV88	V1-22	>tr|Q5NV88|Q5NV88_HUMAN V1-22 protein (Fragment) OS=Homo sapiens GN=V1-22 PE=1 SV=1
Apolipoprotein A-II;Proapolipoprotein A-II;Truncated apolipoprotein A-II	2	40785700000	48271300000	57650900000	47947600000	57179500000	0.00254138	0.0377259	1.40195	0.713292	0.00838089	1.19254	0.838545	0.894561	0.991823	1.00824	0.000964828	1.18454	0.844206	0.0217765	1.20237	0.831689	0.0635593	1.41351	0.70746	0.00264913	1.19431	0.837303	0.647455	1.1756	0.850631	0.912629	0.993294	1.00675	0.605646	0.844926	1.18353	V9GYM3;P02652;V9GYE3;V9GYC1;V9GYS1	V9GYM3;P02652;V9GYE3	APOA2	>tr|V9GYM3|V9GYM3_HUMAN Apolipoprotein A-II OS=Homo sapiens GN=APOA2 PE=1 SV=1;>sp|P02652|APOA2_HUMAN Apolipoprotein A-II OS=Homo sapiens GN=APOA2 PE=1 SV=1;>tr|V9GYE3|V9GYE3_HUMAN Apolipoprotein A-II OS=Homo sapiens GN=APOA2 PE=1 SV=1
Transthyretin	13	7408110000	4609250000	7332230000	7032250000	5970130000	0.00284316	0.166348	0.805891	1.24086	0.339155	0.848964	1.17791	0.161192	0.814231	1.22815	0.0798811	1.29525	0.772052	0.812087	1.04266	0.959087	0.948602	0.989757	1.01035	0.00213398	1.59076	0.628629	0.770941	0.949264	1.05345	0.0100241	1.52568	0.655445	0.0016767	1.60723	0.62219	E9KL36;A6XGL1;P02766;A0A087WT59;A6XMH1;A0A087WV45;Q8TDB2;Q53WY6	E9KL36;A6XGL1;P02766;A0A087WT59;A6XMH1;A0A087WV45	HEL111 TTR	>tr|E9KL36|E9KL36_HUMAN Epididymis luminal protein 111 OS=Homo sapiens GN=HEL111 PE=2 SV=1;>tr|A6XGL1|A6XGL1_HUMAN Transthyretin OS=Homo sapiens PE=2 SV=1;>sp|P02766|TTHY_HUMAN Transthyretin OS=Homo sapiens GN=TTR PE=1 SV=1;>tr|A0A087WT59|A0A087WT59_HUMAN
Dystroglycan;Alpha-dystroglycan;Beta-dystroglycan	5	7371000	0	0	0	0	0.00293126	0.0790484	0	n/a	1	n/a	n/a	1	n/a	n/a	1	n/a	n/a	1	n/a	n/a	0.101404	0	n/a	1	n/a	n/a	0.0952376	0	n/a	1	n/a	n/a	0.00612588	n/a	0	A0A024R2W4;Q14118;B4DN78	A0A024R2W4;Q14118;B4DN78	DAG1	>tr|A0A024R2W4|A0A024R2W4_HUMAN Dystroglycan 1 (Dystrophin-associated glycoprotein 1), isoform CRA_a OS=Homo sapiens GN=DAG1 PE=4 SV=1;>sp|Q14118|DAG1_HUMAN Dystroglycan OS=Homo sapiens GN=DAG1 PE=1 SV=2;>tr|B4DN78|B4DN78_HUMAN cDNA FLJ51254, highly simila
Heparin cofactor 2	29	3503810000	3575920000	5181320000	3433950000	3662500000	0.00319108	0.704413	1.04529	0.956672	0.621139	1.06656	0.937597	6.67356e-05	0.706866	1.41469	0.83431	1.02421	0.97636	0.00145468	1.50885	0.662756	0.000800401	1.47877	0.676239	0.000611883	1.44895	0.690156	0.900198	0.980062	1.02034	0.770619	0.960298	1.04134	0.874014	0.979835	1.02058	P05546;Q8IVC0;CON__ENSEMBL:ENSBTAP00000018574	P05546;Q8IVC0	SERPIND1	>sp|P05546|HEP2_HUMAN Heparin cofactor 2 OS=Homo sapiens GN=SERPIND1 PE=1 SV=3;>tr|Q8IVC0|Q8IVC0_HUMAN Serpin peptidase inhibitor, clade D (Heparin cofactor), member 1 OS=Homo sapiens GN=SERPIND1 PE=2 SV=1
Ceruloplasmin	2	171491000	54273300	182370000	598318000	7576770	0.00328958	0.102011	0.0441817	22.6338	0.0169765	0.0126634	78.9674	0.0400671	0.0415461	24.0696	0.583017	0.139604	7.16312	0.13204	0.304804	3.28079	0.935655	1.06344	0.940347	0.225295	3.36022	0.2976	0.108126	3.48892	0.286622	0.0027514	11.0242	0.0907098	0.268784	3.15977	0.316479	E9PFZ2;Q6NSB2;D6RE86	E9PFZ2	CP	>tr|E9PFZ2|E9PFZ2_HUMAN Ceruloplasmin OS=Homo sapiens GN=CP PE=4 SV=1
Complement C4-A;Complement C4 beta chain;Complement C4-A alpha chain;C4a anaphylatoxin;C4b-A;C4d-A;Complement C4 gamma chain	3	1855730000	1390840000	2444980000	1579850000	1469940000	0.00375597	0.158994	0.792109	1.26245	0.743869	0.93043	1.07477	0.000156009	0.601207	1.66332	0.729069	1.05687	0.946188	0.0324397	1.5476	0.646161	0.078019	1.31753	0.758996	0.00011805	1.75792	0.568855	0.493463	0.851336	1.17462	0.529302	1.1359	0.880362	0.0809016	1.33425	0.749484	P0C0L4;Q6U2K2	P0C0L4	C4A	>sp|P0C0L4|CO4A_HUMAN Complement C4-A OS=Homo sapiens GN=C4A PE=1 SV=2
Vitamin K-dependent protein Z	11	24873200	26283500	48502900	20099600	49013900	0.00383903	0.0180438	1.97055	0.507472	0.00446766	2.43855	0.41008	0.967069	1.01054	0.989574	0.00383971	1.86482	0.536246	0.0221337	2.41313	0.4144	0.0549817	1.95001	0.512819	0.0151671	1.84537	0.541895	0.615047	0.808083	1.2375	0.415517	0.764723	1.30766	0.851882	0.946343	1.0567	B0YJC6;P22891	B0YJC6;P22891	PROZ	>tr|B0YJC6|B0YJC6_HUMAN Vitamin K-dependent protein Z variant 1 OS=Homo sapiens GN=PROZ PE=3 SV=1;>sp|P22891|PROZ_HUMAN Vitamin K-dependent protein Z OS=Homo sapiens GN=PROZ PE=1 SV=2
Complement C1s subcomponent;Complement C1s subcomponent heavy chain;Complement C1s subcomponent light chain	39	3291640000	3195010000	2756740000	3090410000	2809560000	0.00388913	0.00357241	0.853544	1.17159	0.0694875	0.909122	1.09996	0.67482	1.01916	0.9812	0.00724689	0.879359	1.13719	0.0660453	0.892031	1.12104	0.00509142	0.837497	1.19403	0.00624979	0.862827	1.15898	0.320719	0.938866	1.06511	0.525548	0.967261	1.03385	0.551512	1.03024	0.970644	B3KNX0;P09871;F8WCZ6;A0A087X232;A8K2N0;H0Y5D1;F5H7T4;B5MCV4	B3KNX0;P09871;F8WCZ6;A0A087X232;A8K2N0	C1S	>tr|B3KNX0|B3KNX0_HUMAN cDNA FLJ30621 fis, clone CTONG2001681, highly similar to Complement C1s subcomponent (EC 3.4.21.42) OS=Homo sapiens PE=2 SV=1;>sp|P09871|C1S_HUMAN Complement C1s subcomponent OS=Homo sapiens GN=C1S PE=1 SV=1;>tr|F8WCZ6|F8WCZ6_HUMAN
Hepatocyte growth factor activator;Hepatocyte growth factor activator short chain;Hepatocyte growth factor activator long chain	13	69969800	93285400	101081000	62242400	130859000	0.00412238	0.000656168	1.87022	0.534696	0.000234422	2.10241	0.475645	0.0822459	1.2946	0.772442	0.0304136	1.40278	0.71287	0.0361856	1.62399	0.615768	0.0815473	1.44464	0.692215	0.66762	1.08357	0.922878	0.671641	0.889561	1.12415	0.0901056	0.667226	1.49874	0.182477	0.750062	1.33322	D6RAR4;Q04756;CON__ENSEMBL:ENSBTAP00000023055	D6RAR4;Q04756	HGFAC	>tr|D6RAR4|D6RAR4_HUMAN Hepatocyte growth factor activator OS=Homo sapiens GN=HGFAC PE=3 SV=1;>sp|Q04756|HGFA_HUMAN Hepatocyte growth factor activator OS=Homo sapiens GN=HGFAC PE=1 SV=1
Apolipoprotein F	7	195841000	171479000	171652000	226692000	109696000	0.00417118	0.00090251	0.560128	1.78531	0.000186614	0.483899	2.06655	0.0334761	0.63906	1.5648	0.0196845	0.639705	1.56322	0.100335	0.757204	1.32065	0.392231	0.876487	1.14092	0.995197	1.00101	0.998992	0.290748	1.15753	0.863908	0.056602	1.32198	0.75644	0.349818	1.14207	0.875603	Q13790;B2RC09	Q13790;B2RC09	APOF	>sp|Q13790|APOF_HUMAN Apolipoprotein F OS=Homo sapiens GN=APOF PE=1 SV=2;>tr|B2RC09|B2RC09_HUMAN cDNA, FLJ95794, highly similar to Homo sapiens apolipoprotein F (APOF), mRNA OS=Homo sapiens PE=2 SV=1
Cryocrystalglobulin CC1	6	1486280000	2475790000	2196960000	2148440000	2250650000	0.00447516	0.00583822	1.51428	0.660378	0.715761	1.04757	0.954586	0.784725	1.02444	0.976145	0.391539	0.909063	1.10003	0.861773	1.02258	0.977915	0.0098051	1.47816	0.676517	0.307631	0.887377	1.12692	0.0498648	1.44551	0.691795	0.272529	0.86778	1.15237	0.000686807	0.600326	1.66576	B1N7B8	B1N7B8		>tr|B1N7B8|B1N7B8_HUMAN Cryocrystalglobulin CC1 kappa light chain variable region (Fragment) OS=Homo sapiens PE=2 SV=1
Apolipoprotein M	14	1258290000	1212070000	1353710000	1187770000	1520770000	0.00468607	0.00540888	1.2086	0.827403	0.000518029	1.28036	0.781032	0.0433036	1.12341	0.890148	0.000420691	1.25469	0.797011	0.127165	1.13971	0.877418	0.374466	1.07583	0.929512	0.138484	1.11686	0.895369	0.536184	0.943956	1.05937	0.803075	0.979952	1.02046	0.62493	1.03813	0.963268	O95445;Q5SRP5;I2D5J2;I2D5I8	O95445;Q5SRP5	APOM	>sp|O95445|APOM_HUMAN Apolipoprotein M OS=Homo sapiens GN=APOM PE=1 SV=2;>tr|Q5SRP5|Q5SRP5_HUMAN Apolipoprotein M OS=Homo sapiens GN=APOM PE=1 SV=1
Complement C1q subcomponent subunit B	10	1689600000	1251910000	1566160000	1458250000	1424040000	0.00469059	0.0459028	0.842827	1.18648	0.782239	0.97654	1.02402	0.266908	0.909256	1.0998	0.165117	1.13749	0.879126	0.455335	1.074	0.931099	0.412377	0.926941	1.07882	0.0231559	1.25102	0.79935	0.117826	0.863074	1.15865	0.124836	1.16482	0.858502	0.00124407	1.34962	0.740951	D6R934;A0A024RAB9;P02746;D6RGJ1	D6R934;A0A024RAB9;P02746	C1QB	>tr|D6R934|D6R934_HUMAN Complement C1q subcomponent subunit B OS=Homo sapiens GN=C1QB PE=4 SV=1;>tr|A0A024RAB9|A0A024RAB9_HUMAN Complement component 1, q subcomponent, B chain, isoform CRA_a OS=Homo sapiens GN=C1QB PE=4 SV=1;>sp|P02746|C1QB_HUMAN Complemen
Hepatocyte growth factor-like protein;Hepatocyte growth factor-like protein alpha chain;Hepatocyte growth factor-like protein beta chain	22	82405300	74429700	82188800	43832400	41090600	0.00485937	0.00913018	0.49864	2.00545	0.829264	0.937448	1.06673	0.00638918	0.499954	2.00018	0.00647542	0.552073	1.81136	0.0148315	1.87507	0.533314	0.990286	0.997373	1.00263	0.567374	1.10425	0.905594	0.0199466	0.531912	1.88001	0.0169963	0.58891	1.69805	0.55398	1.10716	0.903215	Q53GN8;G3XAK1;P26927;B7Z250;Q13208;Q2TV78;B7Z557;Q49A61;B7Z538;H7C0F8;B7Z3P3	Q53GN8;G3XAK1;P26927	MST1	>tr|Q53GN8|Q53GN8_HUMAN Macrophage stimulating 1 (Hepatocyte growth factor-like) variant (Fragment) OS=Homo sapiens PE=2 SV=1;>tr|G3XAK1|G3XAK1_HUMAN Hepatocyte growth factor-like protein alpha chain OS=Homo sapiens GN=MST1 PE=3 SV=1;>sp|P26927|HGFL_HUMAN
Peroxiredoxin-2	5	6015520	0	2911560	5911560	0	0.00495287	0.0321327	0	n/a	1	0	n/a	0.0128766	0	n/a	1	n/a	n/a	0.0149148	0.49252	2.03038	0.379898	0.484008	2.06608	0.0174843	n/a	0	0.346337	0.982718	1.01759	1	n/a	0	0.120351	n/a	0	B4DF70;V9HW12;P32119;A6NIW5;A0A024R7F2;B2R4P2;Q06830	B4DF70;V9HW12;P32119;A6NIW5	HEL-S-2a PRDX2	>tr|B4DF70|B4DF70_HUMAN cDNA FLJ60461, highly similar to Peroxiredoxin-2 (EC 1.11.1.15) OS=Homo sapiens PE=2 SV=1;>tr|V9HW12|V9HW12_HUMAN Epididymis secretory sperm binding protein Li 2a OS=Homo sapiens GN=HEL-S-2a PE=2 SV=1;>sp|P32119|PRDX2_HUMAN Peroxire
Platelet glycoprotein Ib alpha chain;Glycocalicin	5	9579190	0	4148260	1958250	0	0.00522872	0.0400078	0	n/a	0.296694	0	n/a	0.128832	0	n/a	1	n/a	n/a	0.530195	2.11835	0.472065	0.335113	0.433049	2.30921	0.0175035	n/a	0	0.144631	0.204428	4.89171	0.101966	n/a	0	0.00137801	n/a	0	L7UYB8;E0D852;E0D853;E0D854;L7UV37;A5CKE2;E0D851;P07359;E5FY30;L7URT5;Q06AK0	L7UYB8;E0D852;E0D853;E0D854;L7UV37;A5CKE2;E0D851;P07359;E5FY30;L7URT5	GP1BA	>tr|L7UYB8|L7UYB8_HUMAN Glycoprotein Ib alpha polypeptide G942 deletion mutant OS=Homo sapiens GN=GP1BA PE=2 SV=1;>tr|E0D852|E0D852_HUMAN Platelet glycoprotein Ib alpha polypeptide type 2 OS=Homo sapiens GN=GP1BA PE=4 SV=1;>tr|E0D853|E0D853_HUMAN Platelet
Apolipoprotein C-I;Truncated apolipoprotein C-I	2	1525660000	764201000	1333620000	1013720000	957408000	0.00561176	0.098932	0.627537	1.59353	0.819737	0.94445	1.05882	0.0790886	0.717902	1.39295	0.209874	1.25282	0.798198	0.22951	1.31557	0.760127	0.599098	0.874127	1.144	0.000748753	1.74512	0.573028	0.184147	0.664447	1.50501	0.173346	1.32651	0.753858	0.00150017	1.99641	0.500899	K7ERI9;A0A024R0T8;P02654	K7ERI9 A0A024R0T8 P02654	APOC1	>tr|K7ERI9|K7ERI9_HUMAN Truncated apolipoprotein C-I (Fragment) OS=Homo sapiens GN=APOC1 PE=4 SV=1;>tr|A0A024R0T8|A0A024R0T8_HUMAN Apolipoprotein C-I, isoform CRA_a OS=Homo sapiens GN=APOC1 PE=4 SV=1;>sp|P02654|APOC1_HUMAN Apolipoprotein C-I OS=Homo sapien
C4b-binding protein beta chain	7	240483000	233706000	382303000	312025000	300900000	0.00566359	0.131004	1.25123	0.799212	0.823168	0.964346	1.03697	0.0188365	0.787072	1.27053	0.111892	1.28752	0.77669	0.15908	1.22523	0.816172	0.000413967	1.58973	0.629038	0.000858294	1.63583	0.611311	0.176986	1.29749	0.770717	0.109875	1.33512	0.748998	0.875456	1.029	0.971819	P20851;Q5VVQ7;B4DDY0	P20851	C4BPB	>sp|P20851|C4BPB_HUMAN C4b-binding protein beta chain OS=Homo sapiens GN=C4BPB PE=1 SV=1
Serum amyloid A-1 protein;Amyloid protein A;Serum amyloid protein A(2-104);Serum amyloid protein A(3-104);Serum amyloid protein A(2-103);Serum amyloid protein A(2-102);Serum amyloid protein A(4-101)	3	129044000	432771000	50110000	732172000	48749000	0.00571639	0.211984	0.37777	2.64711	0.0150053	0.0665813	15.0192	0.958241	0.97284	1.02792	0.0324976	0.112644	8.87754	0.0236024	0.0684402	14.6113	0.260342	0.388317	2.57521	0.0468141	0.115789	8.63642	0.0353004	5.67382	0.176248	0.242344	1.69182	0.591078	0.0968726	0.298181	3.35367	P0DJI8	P0DJI8	SAA1	>sp|P0DJI8|SAA1_HUMAN Serum amyloid A-1 protein OS=Homo sapiens GN=SAA1 PE=1 SV=1
Complement C2;Complement C2b fragment;Complement C2a fragment	9	426938000	374444000	422647000	393020000	261695000	0.00572491	0.00112969	0.612958	1.63143	0.00934453	0.665857	1.50182	5.66239e-05	0.619181	1.61504	0.00998776	0.69889	1.43084	0.494451	1.07538	0.929901	0.921617	0.989949	1.01015	0.257932	1.12873	0.88595	0.530219	0.920555	1.0863	0.690587	1.04961	0.952735	0.246676	1.14019	0.877045	Q5JP69;P06681;B4DV48;Q53HP3;Q53GZ8;H0Y3H6;B4DQI1;Q95IG1;E9PDZ0;B3KTX9;Q8N6L6;H0Y868;Q86SV5	Q5JP69;P06681;B4DV48;Q53HP3;Q53GZ8;H0Y3H6;B4DQI1;Q95IG1;E9PDZ0	C2	>tr|Q5JP69|Q5JP69_HUMAN Complement component 2, isoform CRA_b OS=Homo sapiens GN=C2 PE=1 SV=1;>sp|P06681|CO2_HUMAN Complement C2 OS=Homo sapiens GN=C2 PE=1 SV=2;>tr|B4DV48|B4DV48_HUMAN cDNA FLJ55526, highly similar to Complement C2 (EC 3.4.21.43) OS=Homo s
Phosphatidylcholine-sterol acyltransferase	10	35475500	65329300	110772000	45834600	61449700	0.00674994	0.162197	1.73217	0.57731	0.448903	1.34068	0.745888	0.0278602	0.55474	1.80265	0.83037	0.940615	1.06313	0.0039875	2.41678	0.413774	0.000256382	3.12249	0.320257	0.0198511	1.69559	0.589764	0.563586	1.29201	0.77399	0.292101	0.701593	1.42533	0.0820436	0.543026	1.84153	P04180;J3QSE5;J3QKT0;I3L1Q6	P04180;J3QSE5	LCAT	>sp|P04180|LCAT_HUMAN Phosphatidylcholine-sterol acyltransferase OS=Homo sapiens GN=LCAT PE=1 SV=1;>tr|J3QSE5|J3QSE5_HUMAN Phosphatidylcholine-sterol acyltransferase (Fragment) OS=Homo sapiens GN=LCAT PE=4 SV=1
Insulin-like growth factor-binding protein 2	6	18563200	0	0	0	0	0.0073556	0.101734	0	n/a	1	n/a	n/a	1	n/a	n/a	1	n/a	n/a	1	n/a	n/a	0.126951	0	n/a	1	n/a	n/a	0.12006	0	n/a	1	n/a	n/a	0.0105934	n/a	0	C9JMY1;P18065;C9JW52;H7C1H0;Q59FF1	C9JMY1;P18065;C9JW52	IGFBP2	>tr|C9JMY1|C9JMY1_HUMAN Insulin-like growth factor-binding protein 2 OS=Homo sapiens GN=IGFBP2 PE=4 SV=1;>sp|P18065|IBP2_HUMAN Insulin-like growth factor-binding protein 2 OS=Homo sapiens GN=IGFBP2 PE=1 SV=2;>tr|C9JW52|C9JW52_HUMAN Insulin-like growth fact
Complement component C9;Complement component C9a;Complement component C9b	31	3422050000	3611770000	3042560000	3898850000	2822310000	0.00764518	0.00666405	0.824742	1.2125	0.000149043	0.723883	1.38144	0.280933	0.92761	1.07804	0.00701716	0.78142	1.27972	0.0161846	0.780374	1.28144	0.202817	0.889104	1.12473	0.0872445	0.842401	1.18708	0.163843	1.13933	0.877708	0.403744	1.07948	0.926368	0.547026	0.947472	1.05544	A0A024R035;P02748;CON__Q3MHN2;REV__Q3C1W0;REV__Q4AC99	A0A024R035;P02748	C9	>tr|A0A024R035|A0A024R035_HUMAN Complement component 9, isoform CRA_a OS=Homo sapiens GN=C9 PE=4 SV=1;>sp|P02748|CO9_HUMAN Complement component C9 OS=Homo sapiens GN=C9 PE=1 SV=2
Insulin-like growth factor-binding protein 3	5	36289000	9095510	37004000	10936800	6755810	0.00896778	0.0415508	0.186167	5.37152	0.682086	0.617714	1.61887	0.0246146	0.18257	5.47736	0.761325	0.742763	1.34632	0.065726	3.38344	0.295557	0.967102	1.0197	0.980678	0.00507919	4.06838	0.245798	0.0963837	0.301381	3.31806	0.821361	1.20244	0.831643	0.00882168	3.98977	0.250641	A6XND1;A6XND0;P17936;B3KTQ0;B4DP07;B4DN53;H0Y485;H0Y5K2;B3KVY6;B3KTS0;B3KWK7;A6XNC9;B3KVF9;Q6ZSD0;B3KRZ1;B3KTS7;B3KRJ8;B3KPF0;C9JMX4	A6XND1;A6XND0;P17936;B3KTQ0;B4DP07;B4DN53;H0Y485;H0Y5K2;B3KVY6;B3KTS0;B3KWK7;A6XNC9;B3KVF9;Q6ZSD0;B3KRZ1	IGFBP3	>tr|A6XND1|A6XND1_HUMAN Insulin-like growth factor binding protein 3 isoform b OS=Homo sapiens GN=IGFBP3 PE=2 SV=1;>tr|A6XND0|A6XND0_HUMAN Insulin-like growth factor binding protein 3 OS=Homo sapiens GN=IGFBP3 PE=2 SV=1;>sp|P17936|IBP3_HUMAN Insulin-like g
APOB	2	6239640	44919100	0	0	0	0.00920333	0.001245	n/a	n/a	0.296694	0	n/a	1	n/a	n/a	0.0473027	0	n/a	0.330732	0	n/a	1	n/a	n/a	0.0640312	0	n/a	0.296694	n/a	n/a	0.108016	0.138908	7.19899	0.0473027	n/a	n/a	Q7Z7Q0	Q7Z7Q0	APOB	>tr|Q7Z7Q0|Q7Z7Q0_HUMAN APOB protein OS=Homo sapiens GN=APOB PE=2 SV=1
Ficolin-3	11	604909000	451057000	601460000	375730000	514238000	0.0100386	0.26747	0.850108	1.17632	0.0631645	1.36864	0.730654	0.107436	0.854983	1.16961	0.293079	1.14007	0.877137	0.00364955	1.60078	0.624697	0.967198	0.994298	1.00573	0.0174489	1.33345	0.749937	0.0210036	0.621135	1.60996	0.279141	0.832999	1.20048	0.0324666	1.34109	0.745661	O75636;Q6UY50;Q6UXM4;Q5SSB9	O75636;Q6UY50;Q6UXM4	FCN3 UNQ172	>sp|O75636|FCN3_HUMAN Ficolin-3 OS=Homo sapiens GN=FCN3 PE=1 SV=2;>tr|Q6UY50|Q6UY50_HUMAN NL3 OS=Homo sapiens GN=UNQ172 PE=2 SV=1;>tr|Q6UXM4|Q6UXM4_HUMAN Ficolin (Collagen/fibrinogen domain containing) 3 (Hakata antigen), isoform CRA_b OS=Homo sapiens GN=F
IgGFc-binding protein	19	17206500	0	0	4285000	0	0.0110919	0.0855858	0	n/a	0.296694	0	n/a	1	n/a	n/a	1	n/a	n/a	0.330732	0	n/a	0.108837	0	n/a	1	n/a	n/a	0.250761	0.249034	4.01552	0.101966	n/a	0	0.00728182	n/a	0	A0A087WXI2;Q9Y6R7;A0A087WUZ2	A0A087WXI2;Q9Y6R7	FCGBP	>tr|A0A087WXI2|A0A087WXI2_HUMAN IgGFc-binding protein OS=Homo sapiens GN=FCGBP PE=4 SV=1;>sp|Q9Y6R7|FCGBP_HUMAN IgGFc-binding protein OS=Homo sapiens GN=FCGBP PE=1 SV=3
Complement C4-B	2	484300000	132817000	92095900	194386000	150510000	0.0112843	0.0412178	0.310778	3.21773	0.607248	0.774284	1.29152	0.276547	1.63427	0.611892	0.823609	1.13321	0.882446	0.316888	0.473778	2.11069	0.0305071	0.190163	5.25865	0.648248	0.693404	1.44216	0.124471	0.401375	2.49143	0.528167	1.46356	0.683264	0.00701624	3.64637	0.274245	B7Z1F8	B7Z1F8		>tr|B7Z1F8|B7Z1F8_HUMAN cDNA FLJ53025, highly similar to Complement C4-B OS=Homo sapiens PE=2 SV=1
Serum amyloid A-2 protein	5	10483500	148480000	0	270290000	0	0.0126254	0.321327	0	n/a	0.0386314	0	n/a	1	n/a	n/a	0.0443403	0	n/a	0.0536936	0	n/a	0.355244	0	n/a	0.0604526	0	n/a	0.047309	25.7824	0.0387861	0.279143	1.82038	0.549336	0.0623721	0.0706055	14.1632	P0DJI9	P0DJI9	SAA2	>sp|P0DJI9|SAA2_HUMAN Serum amyloid A-2 protein OS=Homo sapiens GN=SAA2 PE=1 SV=1
Complement C1r subcomponent;Complement C1r subcomponent heavy chain;Complement C1r subcomponent light chain	2	4659340000	4501750000	4130440000	4166500000	4170140000	0.0133721	0.00617341	0.895007	1.11731	0.980293	1.00087	0.999127	0.789277	1.00961	0.99048	0.0616354	0.926338	1.07952	0.836493	0.991345	1.00873	0.00980366	0.886486	1.12805	0.0577385	0.917519	1.0899	0.0144289	0.894225	1.11829	0.0812787	0.925529	1.08046	0.414017	1.03501	0.966178	A8K5J8;B4DPQ0;P00736;F5H2D0;D3DUT5;F5H1V0;F5H6Y3;F5H3N3	A8K5J8;B4DPQ0;P00736;F5H2D0	C1R	>tr|A8K5J8|A8K5J8_HUMAN cDNA FLJ75066, highly similar to Homo sapiens complement component 1, r subcomponent (C1R), mRNA OS=Homo sapiens PE=2 SV=1;>tr|B4DPQ0|B4DPQ0_HUMAN Complement C1r subcomponent OS=Homo sapiens GN=C1R PE=2 SV=1;>sp|P00736|C1R_HUMAN Com
Plasma kallikrein;Plasma kallikrein heavy chain;Plasma kallikrein light chain	30	2078630000	2445230000	2511470000	2318510000	2404500000	0.0136317	0.00394634	1.15677	0.864475	0.533544	1.03709	0.964238	0.41903	0.957407	1.04449	0.722485	0.983343	1.01694	0.230939	1.08323	0.923169	0.00154077	1.20823	0.827655	0.605861	1.02709	0.973625	0.0830502	1.1154	0.896537	0.328939	0.948177	1.05466	0.00170392	0.850075	1.17637	H0YAC1;P03952;A8K9A9;E9PBC5;B4DMX2;C9JCT1;C9J075;C9IYG8	H0YAC1;P03952;A8K9A9;E9PBC5;B4DMX2	KLKB1	>tr|H0YAC1|H0YAC1_HUMAN Plasma kallikrein heavy chain (Fragment) OS=Homo sapiens GN=KLKB1 PE=3 SV=1;>sp|P03952|KLKB1_HUMAN Plasma kallikrein OS=Homo sapiens GN=KLKB1 PE=1 SV=1;>tr|A8K9A9|A8K9A9_HUMAN cDNA FLJ77744, highly similar to Homo sapiens kallikrein
Ficolin-2	7	14551800	59027500	52618500	80790000	82657100	0.0149164	0.000205003	5.6802	0.17605	0.934811	1.02311	0.977411	0.190741	1.57088	0.636588	0.229513	1.40032	0.714125	0.250634	0.6513	1.53539	0.0423279	3.61594	0.276553	0.759754	0.891423	1.1218	0.000732795	5.55189	0.180119	0.296236	1.36868	0.730629	0.0143306	0.246526	4.05637	Q15485;Q14CE6	Q15485	FCN2	>sp|Q15485|FCN2_HUMAN Ficolin-2 OS=Homo sapiens GN=FCN2 PE=1 SV=2
Coagulation factor XII;Coagulation factor XIIa heavy chain;Beta-factor XIIa part 1;Beta-factor XIIa part 2;Coagulation factor XIIa light chain	2	65808400	90889600	201791000	77625700	116197000	0.015572	0.231176	1.76569	0.566352	0.38596	1.49689	0.668053	0.0937549	0.575828	1.73663	0.494864	1.27844	0.782203	0.00727913	2.59954	0.384684	0.00199462	3.06634	0.326122	0.00470365	2.22018	0.450415	0.735757	1.17957	0.847766	0.705248	0.854066	1.17087	0.450146	0.724048	1.38112	P00748;Q96EF3;Q1JR85	P00748	F12	>sp|P00748|FA12_HUMAN Coagulation factor XII OS=Homo sapiens GN=F12 PE=1 SV=3
Clusterin;Clusterin beta chain;Clusterin alpha chain;Clusterin	29	11989900000	11400600000	12268400000	11189600000	12661700000	0.0179363	0.135969	1.05603	0.946942	0.00346366	1.13156	0.883736	0.354326	1.03206	0.968938	0.00657412	1.11062	0.9004	0.0495487	1.09641	0.912067	0.576313	1.02323	0.977299	0.0825829	1.07612	0.929265	0.148471	0.933252	1.07152	0.680642	0.981492	1.01886	0.222808	1.05169	0.95085	P10909;H0YC35;H0YLK8;B4DW11;H0YAS8;E7ERK6;E7ETB4;E5RG36;E5RGB0;E5RH61;E5RJZ5;Q8IWL5;Q8IWM0;Q6LDQ3	P10909;H0YC35;H0YLK8	CLU	>sp|P10909|CLUS_HUMAN Clusterin OS=Homo sapiens GN=CLU PE=1 SV=1;>tr|H0YC35|H0YC35_HUMAN Clusterin (Fragment) OS=Homo sapiens GN=CLU PE=3 SV=1;>tr|H0YLK8|H0YLK8_HUMAN Clusterin beta chain (Fragment) OS=Homo sapiens GN=CLU PE=4 SV=1
Serum amyloid P-component;Serum amyloid P-component(1-203)	12	5209750000	5429530000	4315260000	4986860000	2930650000	0.0179444	0.0383884	0.562532	1.77768	0.000794986	0.587674	1.70162	0.0230041	0.679136	1.47246	0.00940522	0.539761	1.85267	0.0308495	0.865326	1.15563	0.835975	0.828305	1.20729	0.591785	0.794776	1.25822	0.0202998	0.957217	1.0447	0.047303	0.91847	1.08877	0.440477	0.959521	1.04219	V9HWP0;P02743	V9HWP0;P02743	HEL-S-92n APCS	>tr|V9HWP0|V9HWP0_HUMAN Amyloid P component, serum OS=Homo sapiens GN=HEL-S-92n PE=2 SV=1;>sp|P02743|SAMP_HUMAN Serum amyloid P-component OS=Homo sapiens GN=APCS PE=1 SV=2
Complement component C8 beta chain	2	1892150000	2200380000	2115540000	2287090000	1987230000	0.0182052	0.359276	1.05025	0.952155	0.0231269	0.86889	1.15089	0.253754	0.939349	1.06457	0.0520628	0.90313	1.10726	0.285609	0.924992	1.08109	0.100261	1.11806	0.894405	0.501652	0.961443	1.0401	0.00972162	1.20873	0.827318	0.509034	1.03941	0.962087	0.00976407	0.85992	1.1629	B7Z550;B7ZA94;B7Z555;P07358;A8K9M5	B7Z550;B7ZA94;B7Z555;P07358;A8K9M5	C8B	>tr|B7Z550|B7Z550_HUMAN Complement component 8, beta polypeptide, isoform CRA_b OS=Homo sapiens GN=C8B PE=2 SV=1;>tr|B7ZA94|B7ZA94_HUMAN cDNA, FLJ79108, highly similar to Complement component C8 beta chain OS=Homo sapiens PE=2 SV=1;>tr|B7Z555|B7Z555_HUMAN
Complement C3;Complement C3 beta chain;C3-beta-c;Complement C3 alpha chain;C3a anaphylatoxin;Acylation stimulating protein;Complement C3b alpha chain;Complement C3c alpha chain fragment 1;Complement C3dg fragment;Complement C3g fragment;Complement C3d fragment;Complement C3f fragment;Complement C3c alpha chain fragment 2	200	172186000000	192555000000	230904000000	180434000000	196777000000	0.0190738	0.0544384	1.14282	0.875031	0.292522	1.09058	0.916947	0.0299315	0.852203	1.17343	0.78003	1.02193	0.978544	0.0119906	1.27971	0.781424	0.000802671	1.34101	0.745704	0.0289501	1.19916	0.833918	0.620813	1.0479	0.954288	0.480509	0.937052	1.06718	0.192891	0.894217	1.1183	V9HWA9;P01024;B4E216;M0QYC8;M0QXZ3;B4DR57;M0R0Q9;M0R1Q1	V9HWA9;P01024;B4E216	HEL-S-62p C3	>tr|V9HWA9|V9HWA9_HUMAN Epididymis secretory sperm binding protein Li 62p OS=Homo sapiens GN=HEL-S-62p PE=2 SV=1;>sp|P01024|CO3_HUMAN Complement C3 OS=Homo sapiens GN=C3 PE=1 SV=2;>tr|B4E216|B4E216_HUMAN cDNA FLJ57339, highly similar to Complement C3 OS=Ho
Coagulation factor XI;Coagulation factor XIa heavy chain;Coagulation factor XIa light chain	14	97975200	105241000	134307000	104411000	69204100	0.0207652	0.117813	0.706343	1.41574	0.0744028	0.662805	1.50874	6.35454e-05	0.515268	1.94074	0.0321307	0.657577	1.52073	0.0798802	1.28633	0.777405	0.023023	1.37083	0.729487	0.0748245	1.27619	0.783585	0.745589	1.06569	0.938361	0.962825	0.992113	1.00795	0.665373	0.93096	1.07416	P03951;H0Y596;X6R3B1;D6RB32;Q9UEG0	P03951	F11	>sp|P03951|FA11_HUMAN Coagulation factor XI OS=Homo sapiens GN=F11 PE=1 SV=1
Selenoprotein P	11	176418000	242819000	223436000	196293000	191248000	0.0210101	0.614889	1.08406	0.922457	0.869834	0.974299	1.02638	0.189197	0.855941	1.16831	0.0155255	0.787615	1.26966	0.356912	1.13828	0.87852	0.0986163	1.26651	0.789568	0.347153	0.920175	1.08675	0.556592	1.11266	0.898748	0.0516829	0.808392	1.23702	0.00401386	0.726541	1.37638	D6REX5;P49908;D6RIS9;A0A024R054;R4GMT5	D6REX5;P49908	SEPP1	>tr|D6REX5|D6REX5_HUMAN Selenoprotein P (Fragment) OS=Homo sapiens GN=SEPP1 PE=4 SV=1;>sp|P49908|SEPP1_HUMAN Selenoprotein P OS=Homo sapiens GN=SEPP1 PE=1 SV=3
Apolipoprotein C-II	8	2563570000	2657100000	2685260000	2924040000	1834530000	0.022289	0.00123142	0.715615	1.3974	0.000444257	0.627396	1.59389	0.00955155	0.683185	1.46373	0.00332229	0.690426	1.44838	0.579487	0.918339	1.08892	0.736883	1.04747	0.954682	0.934625	1.0106	0.989513	0.28959	1.14061	0.876722	0.419449	1.10046	0.908708	0.749463	0.9648	1.03648	K7ER74;A0A024R0T9;P02655;Q6P163;V9GYJ8;K7EMC3	K7ER74;A0A024R0T9;P02655	APOC4-APOC2 APOC2	>tr|K7ER74|K7ER74_HUMAN Protein APOC4-APOC2 OS=Homo sapiens GN=APOC4-APOC2 PE=4 SV=1;>tr|A0A024R0T9|A0A024R0T9_HUMAN Apolipoprotein C-II, isoform CRA_a OS=Homo sapiens GN=APOC2 PE=4 SV=1;>sp|P02655|APOC2_HUMAN Apolipoprotein C-II OS=Homo sapiens GN=APOC2 P
Haptoglobin-related protein	14	4726210000	3536760000	4112320000	4181060000	4021890000	0.0234484	0.0923954	0.850976	1.17512	0.673967	0.961931	1.03958	0.747351	0.97801	1.02248	0.135786	1.13717	0.879378	0.883744	0.983559	1.01672	0.220499	0.870109	1.14928	0.127314	1.16274	0.86004	0.326207	0.884654	1.13039	0.112727	1.18217	0.8459	0.00402043	1.33631	0.748329	P00739;J3KTC3;Q14552	P00739	HPR	>sp|P00739|HPTR_HUMAN Haptoglobin-related protein OS=Homo sapiens GN=HPR PE=1 SV=2
Superoxide dismutase [Cu-Zn]	2	764348390	0	0	0	0	0.0243211	0.0006741	n/a	n/a	n/a	n/a	n/a	n/a	n/a	n/a	n/a	n/a	n/a	n/a	n/a	n/a	n/a	n/a	n/a	n/a	n/a	n/a	n/a	n/a	n/a	n/a	n/a	n/a	n/a	n/a	n/a	H7BYH4;V9HWC9;P00441		SOD1 HEL-S-44	>tr|H7BYH4|H7BYH4_HUMAN Superoxide dismutase [Cu-Zn] OS=Homo sapiens GN=SOD1 PE=1 SV=1;>tr|V9HWC9|V9HWC9_HUMAN Superoxide dismutase [Cu-Zn] OS=Homo sapiens GN=HEL-S-44 PE=2 SV=1;>sp|P00441|SODC_HUMAN Superoxide dismutase [Cu-Zn] OS=Homo sapiens GN=SOD1 PE=
Alpha-2-antiplasmin	26	5153210000	4887540000	5368100000	4524810000	5064100000	0.0250737	0.729674	0.982708	1.0176	0.0374299	1.11919	0.893507	0.187882	0.943369	1.06003	0.330999	1.03612	0.965135	0.00819442	1.18637	0.842907	0.486919	1.0417	0.959969	0.0257599	1.09832	0.910479	0.0571969	0.878057	1.13888	0.104859	0.925785	1.08016	0.226393	1.05436	0.948446	P08697;C9JMH6;C9JPV4;CON__P28800	P08697;C9JMH6	SERPINF2	>sp|P08697|A2AP_HUMAN Alpha-2-antiplasmin OS=Homo sapiens GN=SERPINF2 PE=1 SV=3;>tr|C9JMH6|C9JMH6_HUMAN Alpha-2-antiplasmin (Fragment) OS=Homo sapiens GN=SERPINF2 PE=3 SV=1
Serotransferrin	2	321910000	3346920000	2241090000	1321190000	5192880000	0.0262519	2.55886e-10	16.1315	0.0619906	0.0023227	3.93046	0.254423	0.0322941	2.31712	0.43157	0.280068	1.55154	0.644521	0.563483	1.69627	0.58953	0.0514214	6.96185	0.14364	0.562244	0.669598	1.49343	0.181452	4.10422	0.243652	0.273009	0.394748	2.53326	0.0441586	0.096181	10.3971	B4DI57;B4DHZ6;H7C5E8;C9JVG0;CON__Q29443;CON__Q0IIK2	B4DI57;B4DHZ6	TF	>tr|B4DI57|B4DI57_HUMAN cDNA FLJ54111, highly similar to Serotransferrin OS=Homo sapiens PE=2 SV=1;>tr|B4DHZ6|B4DHZ6_HUMAN Transferrin, isoform CRA_c OS=Homo sapiens GN=TF PE=2 SV=1
Biotinidase	12	77110300	59901900	96901000	50712900	107101000	0.029735	0.199223	1.38893	0.719977	0.0155689	2.11191	0.473505	0.664896	1.10526	0.904763	0.0119817	1.78794	0.559303	0.0352121	1.91078	0.523348	0.377715	1.25665	0.795764	0.0484349	1.61766	0.618176	0.223465	0.657667	1.52053	0.610558	0.846599	1.1812	0.339567	1.28728	0.776834	P43251;C9JSN9	P43251;C9JSN9	BTD	>sp|P43251|BTD_HUMAN Biotinidase OS=Homo sapiens GN=BTD PE=1 SV=2;>tr|C9JSN9|C9JSN9_HUMAN Biotinidase (Fragment) OS=Homo sapiens GN=BTD PE=4 SV=1
Vitamin D-binding protein	6	57910900000	53800500000	50506100000	52019600000	55463200000	0.0308779	0.359659	0.957733	1.04413	0.236716	1.0662	0.937912	0.0780967	1.09815	0.910624	0.4468	1.0309	0.970022	0.523899	0.970905	1.02997	0.000950057	0.872135	1.14661	0.102069	0.938766	1.06523	0.0130114	0.89827	1.11325	0.388375	0.966898	1.03424	0.0333491	1.0764	0.929022	V9HWI6;P02774;D6RBJ7;D6RF20;CON__Q3MHN5;CON__ENSEMBL:ENSBTAP00000018229;Q6LDC6	V9HWI6;P02774;D6RBJ7	HEL-S-51 GC	>tr|V9HWI6|V9HWI6_HUMAN Epididymis secretory protein Li 51 OS=Homo sapiens GN=HEL-S-51 PE=2 SV=1;>sp|P02774|VTDB_HUMAN Vitamin D-binding protein OS=Homo sapiens GN=GC PE=1 SV=1;>tr|D6RBJ7|D6RBJ7_HUMAN Vitamin D-binding protein OS=Homo sapiens GN=GC PE=1 SV
VCAM-1	2	70151	0	0	481036	0	0.0312654	0.0017658	0	n/a	0.004352	n/a	n/a	0	n/a	0	0	n/a	0	0	0	n/a	0	0	n/a	0	n/a	n/a	1.479e-05	6.85715	0.145833	0	n/a	0	0.00432	n/a	0	Q53FL7;P19320;E9PDD2;G0ZI12;F8UU18;F8UV74	Q53FL7;P19320;E9PDD2;G0ZI12	VCAM1	>tr|Q53FL7|Q53FL7_HUMAN Vascular cell adhesion molecule 1 isoform a variant (Fragment) OS=Homo sapiens PE=2 SV=1;>sp|P19320|VCAM1_HUMAN Vascular cell adhesion protein 1 OS=Homo sapiens GN=VCAM1 PE=1 SV=1;>tr|E9PDD2|E9PDD2_HUMAN Vascular cell adhesion prote	>tr|Q53FL7|Q53FL7_HUMAN Vascular cell adhesion molecule 1 isoform a variant (Fragment) OS=Homo sapiens PE=2 SV=1;>sp|P19320|VCAM1_HUMAN Vascular cell adhesion protein 1 OS=Homo sapiens GN=VCAM1 PE=1 SV=1;>tr|E9PDD2|E9PDD2_HUMAN Vascular cell adhesion prote
Antileukoproteinase	2	0	0	0	0	3240740	0.0327691	0.156849	n/a	0	0.178743	n/a	0	0.186801	n/a	0	0.0268589	n/a	0	1	n/a	n/a	1	n/a	n/a	1	n/a	n/a	1	n/a	n/a	1	n/a	n/a	1	n/a	n/a	P03973	P03973	SLPI	>sp|P03973|SLPI_HUMAN Antileukoproteinase OS=Homo sapiens GN=SLPI PE=1 SV=2
Serum amyloid A-4 protein	2	1998960000	2056980000	1633470000	1963090000	965380000	0.0339243	0.0045082	0.482941	2.07065	0.00132379	0.491766	2.03349	0.0270938	0.591	1.69205	0.00941848	0.469319	2.13075	0.112155	0.832091	1.20179	0.342415	0.81716	1.22375	0.276467	0.794111	1.25927	0.450486	0.982056	1.01827	0.627408	0.954355	1.04783	0.772779	0.971794	1.02903	A0A096LPE2;P35542;Q15423;E9PR14;G3V1D9	A0A096LPE2;P35542	SAA4	>tr|A0A096LPE2|A0A096LPE2_HUMAN Protein SAA2-SAA4 OS=Homo sapiens GN=SAA2-SAA4 PE=4 SV=1;>sp|P35542|SAA4_HUMAN Serum amyloid A-4 protein OS=Homo sapiens GN=SAA4 PE=1 SV=2
Plasminogen;Plasmin heavy chain A;Activation peptide;Angiostatin;Plasmin heavy chain A, short form;Plasmin light chain B	71	16834000000	19211500000	18652700000	19664800000	19154100000	0.0351066	0.0194624	1.13782	0.878872	0.628411	0.97403	1.02666	0.627211	1.02688	0.973823	0.949948	0.997012	1.003	0.272748	0.948532	1.05426	0.0318893	1.10804	0.902497	0.533215	0.970913	1.02996	0.00176724	1.16816	0.856047	0.614506	1.0236	0.976949	0.00547608	0.876246	1.14123	P00747;B2R7F8;B4DPH4;Q68DS2;Q5TEH5;A6PVI2;CON__P06868;Q9UMI2;Q9UE70;Q53QL7;Q15195;Q02325	P00747;B2R7F8;B4DPH4	PLG	>sp|P00747|PLMN_HUMAN Plasminogen OS=Homo sapiens GN=PLG PE=1 SV=2;>tr|B2R7F8|B2R7F8_HUMAN cDNA, FLJ93426, highly similar to Homo sapiens plasminogen (PLG), mRNA OS=Homo sapiens PE=2 SV=1;>tr|B4DPH4|B4DPH4_HUMAN cDNA FLJ58778, highly similar to Plasminogen
Basement membrane-specific heparan sulfate proteoglycan core protein;Endorepellin;LG3 peptide	6	5186450	0	0	0	0	0.0378716	0.163919	0	n/a	1	n/a	n/a	1	n/a	n/a	1	n/a	n/a	1	n/a	n/a	0.194306	0	n/a	1	n/a	n/a	0.186144	0	n/a	1	n/a	n/a	0.0295033	n/a	0	A0A024RAB6;P98160;Q59EG0	A0A024RAB6;P98160;Q59EG0	HSPG2	>tr|A0A024RAB6|A0A024RAB6_HUMAN Heparan sulfate proteoglycan 2 (Perlecan), isoform CRA_b OS=Homo sapiens GN=HSPG2 PE=4 SV=1;>sp|P98160|PGBM_HUMAN Basement membrane-specific heparan sulfate proteoglycan core protein OS=Homo sapiens GN=HSPG2 PE=1 SV=4;>tr|Q5
V5-6 protein	5	13375900	23758500	10967400	63306800	38466500	0.0384737	0.101584	2.87581	0.347729	0.368362	0.60762	1.64576	0.0808645	3.50735	0.285116	0.268367	1.61906	0.617641	0.0552205	0.173242	5.77227	0.830802	0.819937	1.21961	0.291176	0.46162	2.16628	0.0534936	4.7329	0.211287	0.0374621	2.6646	0.375291	0.37277	0.562994	1.77622	Q5NV92;A0A075B6H9;A2N2G8	Q5NV92;A0A075B6H9;A2N2G8	V5-6 IGLV4-69 VLC8	>tr|Q5NV92|Q5NV92_HUMAN V5-6 protein (Fragment) OS=Homo sapiens GN=V5-6 PE=4 SV=1;>tr|A0A075B6H9|A0A075B6H9_HUMAN Protein IGLV4-69 (Fragment) OS=Homo sapiens GN=IGLV4-69 PE=4 SV=1;>tr|A2N2G8|A2N2G8_HUMAN VLC8 protein (Fragment) OS=Homo sapiens GN=VLC8 PE=2
Alpha-2-HS-glycoprotein; Fetuin A	12	18611800000	41702000000	34984300000	20170400000	39941800000	0.0451685	0.00994609	2.14605	0.465973	0.0494776	1.98022	0.504995	0.0188299	1.14171	0.875882	0.476896	0.957791	1.04407	0.0307824	1.73444	0.576556	0.838895	1.87968	0.532004	0.0572229	0.838912	1.19202	0.457456	1.08374	0.922728	0.227866	0.483679	2.06749	0.0329179	0.446305	2.24062	C9JV77;B7Z8Q2;P02765;CON__P12763	C9JV77;B7Z8Q2;P02765	AHSG	>tr|C9JV77|C9JV77_HUMAN Alpha-2-HS-glycoprotein OS=Homo sapiens GN=AHSG PE=1 SV=1;>tr|B7Z8Q2|B7Z8Q2_HUMAN cDNA FLJ55606, highly similar to Alpha-2-HS-glycoprotein OS=Homo sapiens PE=2 SV=1;>sp|P02765|FETUA_HUMAN Alpha-2-HS-glycoprotein OS=Homo sapiens GN=A
C4b-binding protein alpha chain	2	15192000000	16787400000	17652000000	17958100000	16527000000	0.0470911	0.0524692	1.08788	0.919223	0.131369	0.920309	1.08659	0.0676309	0.936268	1.06807	0.757014	0.984488	1.01576	0.765338	0.982955	1.01734	0.00167978	1.16193	0.860639	0.342676	1.0515	0.95102	0.00937665	1.18208	0.845969	0.245823	1.06974	0.934809	0.0723218	0.904964	1.10502	P04003;B4E1E1	P04003;B4E1E1	C4BPA	>sp|P04003|C4BPA_HUMAN C4b-binding protein alpha chain OS=Homo sapiens GN=C4BPA PE=1 SV=2;>tr|B4E1E1|B4E1E1_HUMAN cDNA FLJ51598, highly similar to C4b-binding protein alpha chain OS=Homo sapiens PE=2 SV=1
Calreticulin	2	1347650	0	0	0	0	0.0479933	0.178598	0	n/a	1	n/a	n/a	1	n/a	n/a	1	n/a	n/a	1	n/a	n/a	0.20979	0	n/a	1	n/a	n/a	0.201437	0	n/a	1	n/a	n/a	0.0353984	n/a	0	B4DHR1;Q53G71;V9HW88;P27797;K7EJB9;B4E2Y9	B4DHR1;Q53G71;V9HW88;P27797;K7EJB9;B4E2Y9	HEL-S-99n CALR	>tr|B4DHR1|B4DHR1_HUMAN cDNA FLJ53009, highly similar to Calreticulin OS=Homo sapiens PE=2 SV=1;>tr|Q53G71|Q53G71_HUMAN Calreticulin variant (Fragment) OS=Homo sapiens PE=2 SV=1;>tr|V9HW88|V9HW88_HUMAN Calreticulin, isoform CRA_b OS=Homo sapiens GN=HEL-S-9

## Sheet: Table S2
Table S2. Twenty proteins revealed similar accumulation between CVD and CKD1-2 patients and completely different between CVD and CKD5. n/a - not applicable
Unique Peptides	Mean CKD5	Mean CVD	Mean CKD1-2	Mean CKD3-4	Mean HV	Protein Names	ANOVA p-Value	Fasta Headers	T-Test p-Value HV vs. CKD5	Fold Change HV vs. CKD5	Fold Change CKD5 vs. HV	T-Test p-Value_HV vs. CKD3-4	Fold Change HV vs. CKD3-4	Fold Change CKD3-4 vs. HV	T-Test p-Value_HV vs. CKD1-2	Fold Change HV vs. CKD1-2	Fold Change CKD1-2 vs. HV	T-Test p-Value_HV vs. CVD	Fold Change HV vs. CVD	Fold Change CVD vs. HV	T-Test p-Value_CKD1-2 vs. CKD3-4	Fold Change CKD1-2 vs. CKD3-4	Fold Change CKD3-4 vs. CKD1-2	T-Test p-Value_CKD1-2 vs. CKD5	Fold Change CKD1-2 vs. CKD5	Fold Change CKD5 vs. CKD1-2	T-Test p-Value_CKD1-2 vs. CVD	Fold Change CKD1-2 vs. CVD	Fold Change CVD vs. CKD1-2	t-test p value_CKD3-4 vs CKD5	fold change CKD3-4 vs CKD5	fold change CKD5 vs CKD3-4	t-test p value_CKD3-4 vs CVD	fold change CKD3-4 vs CVD	fold change CVD vs CKD3-4	T-Test p-Value_CKD5 vs. CVD	Fold Change CKD5 vs. CVD	Fold Change CVD vs. CKD5	Protein IDs	Majority Protein IDs	Protein Names	Gene Names	Fasta Headers
11	2637290000	158806000	163182000	1040470000	10929500	Complement factor D	1.83281e-51	>tr|Q6FHW3|Q6FHW3_HUMAN DF protein OS=Homo sapiens GN=DF PE=2 SV=1;>tr|K7ERG9|K7ERG9_HUMAN Complement factor D OS=Homo sapiens GN=CFD PE=3 SV=1;>tr|A6XNE2|A6XNE2_HUMAN Complement factor D preproprotein OS=Homo sapiens PE=2 SV=1;>sp|P00746|CFAD_HUMAN Comple	2.09487e-16	0.00414422	241.3	5.48276e-16	0.0105044	95.1983	0.000414857	0.0669774	14.9304	4.32706e-05	0.068823	14.53	5.74409e-11	0.156835	6.37613	1.11975e-13	0.0618749	16.1616	0.922467	1.02756	0.973183	1.05153e-07	0.394522	2.53471	0	6.55183	0.152629	0	16.607	0.0602156	Q6FHW3;K7ERG9;A6XNE2;P00746	Q6FHW3;K7ERG9;A6XNE2;P00746	Complement factor D	DF;CFD	>tr|Q6FHW3|Q6FHW3_HUMAN DF protein OS=Homo sapiens GN=DF PE=2 SV=1;>tr|K7ERG9|K7ERG9_HUMAN Complement factor D OS=Homo sapiens GN=CFD PE=3 SV=1;>tr|A6XNE2|A6XNE2_HUMAN Complement factor D preproprotein OS=Homo sapiens PE=2 SV=1;>sp|P00746|CFAD_HUMAN Comple
5	111810280	15157600	17691500	75188875	0	Cystatin-C	8.36507e-27	>sp|P01034|CYTC_HUMAN Cystatin-C OS=Homo sapiens GN=CST3 PE=1 SV=1	2.4611e-13	0	n/a	1.3422e-05	0	n/a	0.0172266	0	n/a	0.19711	0	n/a	0.000186196	0.235294	4.25	7.16828e-11	0.158228	6.32	0.865693	1.16717	0.856773	0.0435186	0.672468	1.48706	1.97148e-09	4.96047	0.201594	0	7.37652	0.135565	P01034	P01034	Cystatin-C	CST3	>sp|P01034|CYTC_HUMAN Cystatin-C OS=Homo sapiens GN=CST3 PE=1 SV=1
3	247047000	71279300	75844600	200083000	69031800	Peptidase inhibitor 16	4.64932e-15	>sp|Q6UXB8|PI16_HUMAN Peptidase inhibitor 16 OS=Homo sapiens GN=PI16 PE=1 SV=1	4.15925e-06	0.279428	3.57874	7.28071e-06	0.345016	2.89842	0.656473	0.910174	1.09869	0.87491	0.968469	1.03256	4.65154e-05	0.379066	2.63807	2.63243e-05	0.307005	3.25728	0.760527	1.06405	0.939807	0.276528	0.809899	1.23472	6.12284e-09	2.80703	0.356249	1.71346e-10	3.4659	0.288525	Q6UXB8	Q6UXB8	Peptidase inhibitor 16	PI16	>sp|Q6UXB8|PI16_HUMAN Peptidase inhibitor 16 OS=Homo sapiens GN=PI16 PE=1 SV=1
7	14551800	59027500	52618500	80790000	82657100	Ficolin-2	0.0149164	>sp|Q15485|FCN2_HUMAN Ficolin-2 OS=Homo sapiens GN=FCN2 PE=1 SV=2	0.000205003	5.6802	0.17605	0.934811	1.02311	0.977411	0.190741	1.57088	0.636588	0.229513	1.40032	0.714125	0.250634	0.6513	1.53539	0.0423279	3.61594	0.276553	0.759754	0.891423	1.1218	0.000732795	5.55189	0.180119	0.296236	1.36868	0.730629	0.0143306	0.246526	4.05637	Q15485;Q14CE6	Q15485	Ficolin-2	FCN2	>sp|Q15485|FCN2_HUMAN Ficolin-2 OS=Homo sapiens GN=FCN2 PE=1 SV=2
2	484300000	132817000	92095900	194386000	150510000	Complement C4	0.0112843	>tr|B7Z1F8|B7Z1F8_HUMAN cDNA FLJ53025, highly similar to Complement C4-B OS=Homo sapiens PE=2 SV=1	0.0412178	0.310778	3.21773	0.607248	0.774284	1.29152	0.276547	1.63427	0.611892	0.823609	1.13321	0.882446	0.316888	0.473778	2.11069	0.0305071	0.190163	5.25865	0.648248	0.693404	1.44216	0.124471	0.401375	2.49143	0.528167	1.46356	0.683264	0.00701624	3.64637	0.274245	B7Z1F8	B7Z1F8			>tr|B7Z1F8|B7Z1F8_HUMAN cDNA FLJ53025, highly similar to Complement C4-B OS=Homo sapiens PE=2 SV=1
2	321910000	3346920000	2241090000	1321190000	5192880000	Serrotransferrin	0.0262519	>tr|B4DI57|B4DI57_HUMAN cDNA FLJ54111, highly similar to Serotransferrin OS=Homo sapiens PE=2 SV=1;>tr|B4DHZ6|B4DHZ6_HUMAN Transferrin, isoform CRA_c OS=Homo sapiens GN=TF PE=2 SV=1	2.55886e-10	16.1315	0.0619906	0.0023227	3.93046	0.254423	0.0322941	2.31712	0.43157	0.280068	1.55154	0.644521	0.563483	1.69627	0.58953	0.0514214	6.96185	0.14364	0.562244	0.669598	1.49343	0.181452	4.10422	0.243652	0.273009	0.394748	2.53326	0.0441586	0.096181	10.3971	B4DI57;B4DHZ6;H7C5E8;C9JVG0;CON__Q29443;CON__Q0IIK2	B4DI57;B4DHZ6		TF	>tr|B4DI57|B4DI57_HUMAN cDNA FLJ54111, highly similar to Serotransferrin OS=Homo sapiens PE=2 SV=1;>tr|B4DHZ6|B4DHZ6_HUMAN Transferrin, isoform CRA_c OS=Homo sapiens GN=TF PE=2 SV=1
5	317819000	167868000	147771000	182209000	40888300	Complement factor H-related protein 2	1.08764e-11	>sp|P36980|FHR2_HUMAN Complement factor H-related protein 2 OS=Homo sapiens GN=CFHR2 PE=1 SV=1;>tr|V9GYE7|V9GYE7_HUMAN Complement factor H-related protein 2 OS=Homo sapiens GN=CFHR2 PE=4 SV=1	5.08383e-13	0.128653	7.77286	3.36142e-05	0.224403	4.45626	8.87766e-06	0.2767	3.61402	2.30543e-05	0.243574	4.10553	0.320642	0.810997	1.23305	3.51353e-06	0.464953	2.15075	0.517961	0.880281	1.136	0.00117702	0.573311	1.74426	0.671751	1.08543	0.921294	9.58481e-06	1.89327	0.528187	P36980;V9GYE7	P36980;V9GYE7	Complement factor H-related protein 2	CFHR2	>sp|P36980|FHR2_HUMAN Complement factor H-related protein 2 OS=Homo sapiens GN=CFHR2 PE=1 SV=1;>tr|V9GYE7|V9GYE7_HUMAN Complement factor H-related protein 2 OS=Homo sapiens GN=CFHR2 PE=4 SV=1
7	372561000	5904270	0	152648000	0	Lysozyme C	4.30151e-37	>tr|B2R4C5|B2R4C5_HUMAN C-type lysozyme OS=Homo sapiens GN=LYZ PE=2 SV=1;>sp|P61626|LYSC_HUMAN Lysozyme C OS=Homo sapiens GN=LYZ PE=1 SV=1;>tr|F8VV32|F8VV32_HUMAN Lysozyme C OS=Homo sapiens GN=LYZ PE=1 SV=1	1.52927e-14	0	n/a	2.5414e-05	0	n/a	1	n/a	n/a	0.375116	0	n/a	8.07513e-05	0	n/a	4.03253e-13	0	n/a	0.407959	0	n/a	6.87084e-05	0.409726	2.44065	2.32557e-09	25.8538	0.038679	0	63.1003	0.0158478	B2R4C5;P61626;F8VV32	B2R4C5;P61626;F8VV32	Lysozyme C	LYZ	>tr|B2R4C5|B2R4C5_HUMAN C-type lysozyme OS=Homo sapiens GN=LYZ PE=2 SV=1;>sp|P61626|LYSC_HUMAN Lysozyme C OS=Homo sapiens GN=LYZ PE=1 SV=1;>tr|F8VV32|F8VV32_HUMAN Lysozyme C OS=Homo sapiens GN=LYZ PE=1 SV=1
9	101604000	42757600	55979400	78604000	27580000	Monocyte differentiation antigen CD14;Monocyte differentiation antigen CD14;Monocyte differentiation antigen CD14, urinary form;Monocyte differentiation antigen CD14, membrane-bound form	0.000120546	>tr|B2R888|B2R888_HUMAN Monocyte differentiation antigen CD14 OS=Homo sapiens PE=2 SV=1;>sp|P08571|CD14_HUMAN Monocyte differentiation antigen CD14 OS=Homo sapiens GN=CD14 PE=1 SV=2;>tr|F1C4A7|F1C4A7_HUMAN Monocyte differentiation antigen CD14 OS=Homo sapi	0.000197509	0.271446	3.68397	0.00357473	0.350873	2.85004	0.0643539	0.492681	2.02971	0.260254	0.645032	1.55031	0.223505	0.71217	1.40416	0.0286727	0.550957	1.81502	0.36529	1.30923	0.76381	0.288695	0.773631	1.29261	0.0199128	1.83836	0.543962	0.000287052	2.37628	0.420826	B2R888;P08571;F1C4A7;D6RFL4	B2R888;P08571;F1C4A7;D6RFL4	Monocyte differentiation antigen CD14;Monocyte differentiation antigen CD14;Monocyte differentiation antigen CD14, urinary form;Monocyte differentiation antigen CD14, membrane-bound form	CD14	>tr|B2R888|B2R888_HUMAN Monocyte differentiation antigen CD14 OS=Homo sapiens PE=2 SV=1;>sp|P08571|CD14_HUMAN Monocyte differentiation antigen CD14 OS=Homo sapiens GN=CD14 PE=1 SV=2;>tr|F1C4A7|F1C4A7_HUMAN Monocyte differentiation antigen CD14 OS=Homo sapi
7	70283500	343824000	347868000	142619000	426460000	Glutathione peroxidase 3	2.96587e-14	>tr|A0A087X1J7|A0A087X1J7_HUMAN Glutathione peroxidase 3 OS=Homo sapiens GN=GPX3 PE=4 SV=1;>sp|P22352|GPX3_HUMAN Glutathione peroxidase 3 OS=Homo sapiens GN=GPX3 PE=1 SV=2	4.44e-16	6.06771	0.164807	1.69e-09	2.9902	0.334425	0.517813	1.22592	0.815711	0.0881556	1.24034	0.806228	1.43e-06	2.0292	0.492806	2.19e-11	4.9495	0.202041	0.309176	1.01176	0.988375	0.0411607	2.0292	0.492806	0.000137905	0.414802	2.41079	5.14e-08	0.204417	4.89196	A0A087X1J7;P22352;H0YBE4;E5RG32;H0YC19	A0A087X1J7;P22352	Glutathione peroxidase 3	GPX3	>tr|A0A087X1J7|A0A087X1J7_HUMAN Glutathione peroxidase 3 OS=Homo sapiens GN=GPX3 PE=4 SV=1;>sp|P22352|GPX3_HUMAN Glutathione peroxidase 3 OS=Homo sapiens GN=GPX3 PE=1 SV=2
6	1486280000	2475790000	2196960000	2148440000	2250650000	Cryocrystalglobulin CC1	0.00447516	>tr|B1N7B8|B1N7B8_HUMAN Cryocrystalglobulin CC1 kappa light chain variable region (Fragment) OS=Homo sapiens PE=2 SV=1	0.00583822	1.51428	0.660378	0.715761	1.04757	0.954586	0.784725	1.02444	0.976145	0.391539	0.909063	1.10003	0.861773	1.02258	0.977915	0.0098051	1.47816	0.676517	0.307631	0.887377	1.12692	0.0498648	1.44551	0.691795	0.272529	0.86778	1.15237	0.000686807	0.600326	1.66576	B1N7B8	B1N7B8			>tr|B1N7B8|B1N7B8_HUMAN Cryocrystalglobulin CC1 kappa light chain variable region (Fragment) OS=Homo sapiens PE=2 SV=1
5	13375900	23758500	10967400	63306800	38466500	HUMAN V5-6 protein	0.0384737	>tr|Q5NV92|Q5NV92_HUMAN V5-6 protein (Fragment) OS=Homo sapiens GN=V5-6 PE=4 SV=1;>tr|A0A075B6H9|A0A075B6H9_HUMAN Protein IGLV4-69 (Fragment) OS=Homo sapiens GN=IGLV4-69 PE=4 SV=1;>tr|A2N2G8|A2N2G8_HUMAN VLC8 protein (Fragment) OS=Homo sapiens GN=VLC8 PE=2	0.101584	2.87581	0.347729	0.368362	0.60762	1.64576	0.0808645	3.50735	0.285116	0.268367	1.61906	0.617641	0.0552205	0.173242	5.77227	0.830802	0.819937	1.21961	0.291176	0.46162	2.16628	0.0534936	4.7329	0.211287	0.0374621	2.6646	0.375291	0.37277	0.562994	1.77622	Q5NV92;A0A075B6H9;A2N2G8	Q5NV92;A0A075B6H9;A2N2G8		V5-6;IGLV4-69;VLC8	>tr|Q5NV92|Q5NV92_HUMAN V5-6 protein (Fragment) OS=Homo sapiens GN=V5-6 PE=4 SV=1;>tr|A0A075B6H9|A0A075B6H9_HUMAN Protein IGLV4-69 (Fragment) OS=Homo sapiens GN=IGLV4-69 PE=4 SV=1;>tr|A2N2G8|A2N2G8_HUMAN VLC8 protein (Fragment) OS=Homo sapiens GN=VLC8 PE=2
2	171491000	54273300	182370000	598318000	7576770	Ceruloplasmin	0.00328958	>tr|E9PFZ2|E9PFZ2_HUMAN Ceruloplasmin OS=Homo sapiens GN=CP PE=4 SV=1	0.102011	0.0441817	22.6338	0.0169765	0.0126634	78.9674	0.0400671	0.0415461	24.0696	0.583017	0.139604	7.16312	0.13204	0.304804	3.28079	0.935655	1.06344	0.940347	0.225295	3.36022	0.2976	0.108126	3.48892	0.286622	0.0027514	11.0242	0.0907098	0.268784	3.15977	0.316479	E9PFZ2;Q6NSB2;D6RE86	E9PFZ2		CP	>tr|E9PFZ2|E9PFZ2_HUMAN Ceruloplasmin OS=Homo sapiens GN=CP PE=4 SV=1
3	71858900	114718000	147578000	133865000	153559000	Protein IGKV1-	0.0225444	>tr|A0A087WTK4|A0A087WTK4_HUMAN Protein IGKV1-16 OS=Homo sapiens GN=IGKV1-16 PE=4 SV=1	0.000172275	2.13695	0.467956	0.446098	1.14712	0.87175	0.825543	1.04053	0.961051	0.0907343	1.33858	0.747061	0.674954	1.10244	0.90708	0.00761718	2.05372	0.486921	0.218563	1.28644	0.777338	0.0204778	1.86289	0.536801	0.458166	1.1669	0.856968	0.0639679	0.626396	1.59643	A0A087WTK4	A0A087WTK4			>tr|A0A087WTK4|A0A087WTK4_HUMAN Protein IGKV1-16 OS=Homo sapiens GN=IGKV1-16 PE=4 SV=1
6	108543000	16441600	27419700	42894900	3201870	Angiogenin	5.05755e-16	>tr|W0UV28|W0UV28_HUMAN Ribonuclease A A1 OS=Homo sapiens GN=RAA1 PE=3 SV=1;>sp|P03950|ANGI_HUMAN Angiogenin OS=Homo sapiens GN=ANG PE=1 SV=1	5.98857e-08	0.0294986	33.8999	4.758e-05	0.0746445	13.3968	0.000536737	0.116773	8.56365	0.0337711	0.194742	5.135	0.177893	0.63923	1.56438	8.29366e-05	0.252616	3.95858	0.146662	1.6677	0.599627	0.00157952	0.395188	2.53044	0.00212142	2.60892	0.3833	2.53202e-11	6.60173	0.151475	W0UV28;P03950	W0UV28;P03950	Angiogenin	RAA1;ANG	>tr|W0UV28|W0UV28_HUMAN Ribonuclease A A1 OS=Homo sapiens GN=RAA1 PE=3 SV=1;>sp|P03950|ANGI_HUMAN Angiogenin OS=Homo sapiens GN=ANG PE=1 SV=1
10	16633800000	10596400000	13729400000	16340400000	10299100000	Apolipoprotein C-III	0.00038177	>tr|A3KPE2|A3KPE2_HUMAN Apolipoprotein C-III OS=Homo sapiens GN=APOC3 PE=2 SV=1;>tr|B0YIW2|B0YIW2_HUMAN Apolipoprotein C-III OS=Homo sapiens GN=APOC3 PE=1 SV=1;>sp|P02656|APOC3_HUMAN Apolipoprotein C-III OS=Homo sapiens GN=APOC3 PE=1 SV=1	9.18797e-05	0.619167	1.61507	0.00072538	0.630284	1.58659	0.192972	0.750149	1.33307	0.812725	0.971943	1.02887	0.39734	0.840212	1.19018	0.311901	0.825392	1.21155	0.121708	1.29567	0.771804	0.885766	0.982361	1.01796	0.000331444	1.54207	0.648479	5.01518e-05	1.56976	0.63704	A3KPE2;B0YIW2;P02656	A3KPE2;B0YIW2;P02656	Apolipoprotein C-III	APOC3	>tr|A3KPE2|A3KPE2_HUMAN Apolipoprotein C-III OS=Homo sapiens GN=APOC3 PE=2 SV=1;>tr|B0YIW2|B0YIW2_HUMAN Apolipoprotein C-III OS=Homo sapiens GN=APOC3 PE=1 SV=1;>sp|P02656|APOC3_HUMAN Apolipoprotein C-III OS=Homo sapiens GN=APOC3 PE=1 SV=1
8	56950800	98071500	100900000	49752500	140312000	Fetuin-B	6.05195e-05	>sp|Q9UGM5|FETUB_HUMAN Fetuin-B OS=Homo sapiens GN=FETUB PE=1 SV=2;>tr|Q5J875|Q5J875_HUMAN GUGU gamma form OS=Homo sapiens GN=GUGU PE=2 SV=1;>tr|E9PG08|E9PG08_HUMAN Fetuin-B OS=Homo sapiens GN=FETUB PE=4 SV=1	0.000241973	2.46374	0.405887	9.02e-05	2.8202	0.354585	0.0468169	1.3906	0.719112	0.040073	1.43071	0.698953	0.000290193	2.08039	0.493087	0.000848131	2.02804	0.564428	0.120628	1.02884	0.971967	0.714467	0.873605	1.14468	0.0185268	0.507308	1.97119	0.0382824	0.580707	1.72204	Q9UGM5;Q5J875;E9PG08;B7Z8T3;C9JC68;F8WEP7	Q9UGM5;Q5J875;E9PG08	Fetuin-B	FETUB;GUGU	>sp|Q9UGM5|FETUB_HUMAN Fetuin-B OS=Homo sapiens GN=FETUB PE=1 SV=2;>tr|Q5J875|Q5J875_HUMAN GUGU gamma form OS=Homo sapiens GN=GUGU PE=2 SV=1;>tr|E9PG08|E9PG08_HUMAN Fetuin-B OS=Homo sapiens GN=FETUB PE=4 SV=1
38	503041000	310039000	565526000	760517000	2254650000	Pregnancy zone protein	6.39408e-17	>tr|B2R950|B2R950_HUMAN cDNA, FLJ94213, highly similar to Homo sapiens pregnancy-zone protein (PZP), mRNA OS=Homo sapiens PE=2 SV=1;>sp|P20742|PZP_HUMAN Pregnancy zone protein OS=Homo sapiens GN=PZP PE=1 SV=4	7.86915e-08	4.48204	0.223113	5.44248e-05	2.96463	0.33731	6.45863e-07	3.98682	0.250827	2.22045e-16	7.27215	0.137511	0.472478	0.743607	1.3448	0.750354	1.12421	0.88951	0.0913007	1.82405	0.548231	0.323126	1.51184	0.661446	0.0160493	2.45297	0.407669	0.184631	1.62251	0.616329	B2R950;P20742;F5GXY0	B2R950;P20742	Pregnancy zone protein	PZP	>tr|B2R950|B2R950_HUMAN cDNA, FLJ94213, highly similar to Homo sapiens pregnancy-zone protein (PZP), mRNA OS=Homo sapiens PE=2 SV=1;>sp|P20742|PZP_HUMAN Pregnancy zone protein OS=Homo sapiens GN=PZP PE=1 SV=4
5	10483500	148480000	0	270290000	0	Serum amyloid A-2 protein	0.0126254	>sp|P0DJI9|SAA2_HUMAN Serum amyloid A-2 protein OS=Homo sapiens GN=SAA2 PE=1 SV=1	0.321327	0	n/a	0.0386314	0	n/a	1	n/a	n/a	0.0443403	0	n/a	0.0536936	0	n/a	0.355244	0	n/a	0.0604526	0	n/a	0.047309	25.7824	0.0387861	0.279143	1.82038	0.549336	0.0623721	0.0706055	14.1632	P0DJI9	P0DJI9	Serum amyloid A-2 protein	SAA2	>sp|P0DJI9|SAA2_HUMAN Serum amyloid A-2 protein OS=Homo sapiens GN=SAA2 PE=1 SV=1
27	8830520000	13369500000	12297500000	10406300000	13437100000	Vitronectin;Vitronectin V65 subunit;Vitronectin V10 subunit;Somatomedin-B	1.69171e-17	>tr|D9ZGG2|D9ZGG2_HUMAN Vitronectin OS=Homo sapiens GN=VTN PE=4 SV=1;>sp|P04004|VTNC_HUMAN Vitronectin OS=Homo sapiens GN=VTN PE=1 SV=1;>tr|J7HH10|J7HH10_HUMAN Vitronectin (Fragment) OS=Homo sapiens PE=4 SV=1	2.19143e-10	1.52167	0.657175	0.000151385	1.29125	0.774445	0.817903	1.09267	0.91519	0.0622211	1.00506	0.994969	0.00338455	1.18174	0.846213	1.90011e-07	1.39261	0.718074	0.0589171	0.919817	1.08717	0.00164831	1.17845	0.848574	8.18517e-08	0.778361	1.28475	2.0252e-15	0.660497	1.51401	D9ZGG2;P04004;J7HH10;B7Z553;H0YJW9;F5GX75	D9ZGG2;P04004;J7HH10	Vitronectin;Vitronectin V65 subunit;Vitronectin V10 subunit;Somatomedin-B	VTN	>tr|D9ZGG2|D9ZGG2_HUMAN Vitronectin OS=Homo sapiens GN=VTN PE=4 SV=1;>sp|P04004|VTNC_HUMAN Vitronectin OS=Homo sapiens GN=VTN PE=1 SV=1;>tr|J7HH10|J7HH10_HUMAN Vitronectin (Fragment) OS=Homo sapiens PE=4 SV=1
